# Supplementary material
Source: publisher figshare collection journal article supplement (https://sage.figshare.com/ndownloader/files/35112611)
Supplement: Supplementary file 1 [file 35112611]

SYMBOL,ENSEMBL,ENTREZID,GENENAME,,,,,,
A2M,ENSG00000175899,2,alpha-2-macroglobulin,,,,,,
A4GNT,ENSG00000118017,51146,"alpha-1,4-N-acetylglucosaminyltransferase",,,,,,
AASS,ENSG00000008311,10157,aminoadipate-semialdehyde synthase,,,,,,
AATF,ENSG00000275700,26574,apoptosis antagonizing transcription factor,,,,,,
AATK,ENSG00000181409,9625,apoptosis associated tyrosine kinase,,,,,,
ABAT,ENSG00000183044,18,4-aminobutyrate aminotransferase,,,,,,
ABCA1,ENSG00000165029,19,ATP binding cassette subfamily A member 1,,,,,,
ABCA12,ENSG00000144452,26154,ATP binding cassette subfamily A member 12,,,,,,
ABCA5,ENSG00000154265,23461,ATP binding cassette subfamily A member 5,,,,,,
ABHD12B,ENSG00000131969,145447,abhydrolase domain containing 12B,,,,,,
ABHD6,ENSG00000163686,57406,abhydrolase domain containing 6,,,,,,
ABLIM1,ENSG00000099204,3983,actin binding LIM protein 1,,,,,,
ABLIM3,ENSG00000173210,22885,actin binding LIM protein family member 3,,,,,,
ABRA,ENSG00000174429,137735,actin binding Rho activating protein,,,,,,
ABRACL,ENSG00000146386,58527,ABRA C-terminal like,,,,,,
ACAP1,ENSG00000072818,9744,"ArfGAP with coiled-coil, ankyrin repeat and PH domains 1",,,,,,
ACOX2,ENSG00000168306,8309,acyl-CoA oxidase 2,,,,,,
ACP5,ENSG00000102575,54,"acid phosphatase 5, tartrate resistant",,,,,,
ACP6,ENSG00000162836,51205,"acid phosphatase 6, lysophosphatidic",,,,,,
ACSL4,ENSG00000068366,2182,acyl-CoA synthetase long chain family member 4,,,,,,
ACSM5,ENSG00000183549,54988,acyl-CoA synthetase medium chain family member 5,,,,,,
ACSS3,ENSG00000111058,79611,acyl-CoA synthetase short chain family member 3,,,,,,
ACTA2,ENSG00000107796,59,"actin alpha 2, smooth muscle",,,,,,
ACTB,ENSG00000075624,60,actin beta,,,,,,
ACTG1,ENSG00000184009,71,actin gamma 1,,,,,,
ACTN2,ENSG00000077522,88,actinin alpha 2,,,,,,
ACVR1B,ENSG00000135503,91,activin A receptor type 1B,,,,,,
ADA,ENSG00000196839,100,adenosine deaminase,,,,,,
ADAM11,ENSG00000073670,4185,ADAM metallopeptidase domain 11,,,,,,
ADAM12,ENSG00000148848,8038,ADAM metallopeptidase domain 12,,,,,,
ADAM22,ENSG00000008277,53616,ADAM metallopeptidase domain 22,,,,,,
ADAM33,ENSG00000149451,80332,ADAM metallopeptidase domain 33,,,,,,
ADAM9,ENSG00000168615,8754,ADAM metallopeptidase domain 9,,,,,,
ADAMTS12,ENSG00000151388,81792,ADAM metallopeptidase with thrombospondin type 1 motif 12,,,,,,
ADAMTS14,ENSG00000138316,140766,ADAM metallopeptidase with thrombospondin type 1 motif 14,,,,,,
ADAMTS16,ENSG00000145536,170690,ADAM metallopeptidase with thrombospondin type 1 motif 16,,,,,,
ADAMTS5,ENSG00000154736,11096,ADAM metallopeptidase with thrombospondin type 1 motif 5,,,,,,
ADAMTS8,ENSG00000134917,11095,ADAM metallopeptidase with thrombospondin type 1 motif 8,,,,,,
ADAMTS9,ENSG00000163638,56999,ADAM metallopeptidase with thrombospondin type 1 motif 9,,,,,,
ADAMTSL2,ENSG00000197859,9719,ADAMTS like 2,,,,,,
ADAMTSL3,ENSG00000156218,57188,ADAMTS like 3,,,,,,
ADAMTSL5,ENSG00000185761,339366,ADAMTS like 5,,,,,,
ADAP2,ENSG00000184060,55803,ArfGAP with dual PH domains 2,,,,,,
ADCK5,ENSG00000173137,203054,aarF domain containing kinase 5,,,,,,
ADCY1,ENSG00000164742,107,adenylate cyclase 1,,,,,,
ADIPOQ,ENSG00000181092,9370,"adiponectin, C1Q and collagen domain containing",,,,,,
ADM,ENSG00000148926,133,adrenomedullin,,,,,,
ADORA3,ENSG00000282608,140,adenosine A3 receptor,,,,,,
ADPRHL1,ENSG00000153531,113622,ADP-ribosylhydrolase like 1,,,,,,
ADTRP,ENSG00000111863,84830,androgen dependent TFPI regulating protein,,,,,,
AEN,ENSG00000181026,64782,apoptosis enhancing nuclease,,,,,,
AFAP1L2,ENSG00000169129,84632,actin filament associated protein 1 like 2,,,,,,
AFF1,ENSG00000172493,4299,AF4/FMR2 family member 1,,,,,,
AGPS,ENSG00000018510,8540,alkylglycerone phosphate synthase,,,,,,
AK2,ENSG00000004455,204,adenylate kinase 2,,,,,,
AK8,ENSG00000165695,158067,adenylate kinase 8,,,,,,
AKAP1,ENSG00000121057,8165,A-kinase anchoring protein 1,,,,,,
AKAP12,ENSG00000131016,9590,A-kinase anchoring protein 12,,,,,,
ALAD,ENSG00000148218,210,aminolevulinate dehydratase,,,,,,
ALDH1A2,ENSG00000128918,8854,aldehyde dehydrogenase 1 family member A2,,,,,,
ALDH2,ENSG00000111275,217,aldehyde dehydrogenase 2 family member,,,,,,
ALDH6A1,ENSG00000119711,4329,aldehyde dehydrogenase 6 family member A1,,,,,,
ALG8,ENSG00000159063,79053,"ALG8 alpha-1,3-glucosyltransferase",,,,,,
ALOX5AP,ENSG00000132965,241,arachidonate 5-lipoxygenase activating protein,,,,,,
AMPD3,ENSG00000133805,272,adenosine monophosphate deaminase 3,,,,,,
AMPH,ENSG00000078053,273,amphiphysin,,,,,,
ANGPT1,ENSG00000154188,284,angiopoietin 1,,,,,,
ANGPTL1,ENSG00000116194,9068,angiopoietin like 1,,,,,,
ANGPTL2,ENSG00000136859,23452,angiopoietin like 2,,,,,,
ANGPTL4,ENSG00000167772,51129,angiopoietin like 4,,,,,,
ANK3,ENSG00000151150,288,ankyrin 3,,,,,,
ANKEF1,ENSG00000132623,63926,ankyrin repeat and EF-hand domain containing 1,,,,,,
ANKRD13D,ENSG00000172932,338692,ankyrin repeat domain 13D,,,,,,
ANLN,ENSG00000011426,54443,anillin actin binding protein,,,,,,
ANP32B,ENSG00000136938,10541,acidic nuclear phosphoprotein 32 family member B,,,,,,
ANPEP,ENSG00000166825,290,"alanyl aminopeptidase, membrane",,,,,,
ANTXR2,ENSG00000163297,118429,ANTXR cell adhesion molecule 2,,,,,,
AOAH,ENSG00000136250,313,acyloxyacyl hydrolase,,,,,,
AOC2,ENSG00000131480,314,amine oxidase copper containing 2,,,,,,
AOC3,ENSG00000131471,8639,amine oxidase copper containing 3,,,,,,
AOX1,ENSG00000138356,316,aldehyde oxidase 1,,,,,,
APBB1,ENSG00000166313,322,amyloid beta precursor protein binding family B member 1,,,,,,
APOC1,ENSG00000130208,341,apolipoprotein C1,,,,,,
APOLD1,ENSG00000178878,81575,apolipoprotein L domain containing 1,,,,,,
AR,ENSG00000169083,367,androgen receptor,,,,,,
ARHGAP18,ENSG00000146376,93663,Rho GTPase activating protein 18,,,,,,
ARHGAP20,ENSG00000137727,57569,Rho GTPase activating protein 20,,,,,,
ARHGAP26,ENSG00000145819,23092,Rho GTPase activating protein 26,,,,,,
ARHGAP28,ENSG00000088756,79822,Rho GTPase activating protein 28,,,,,,
ARHGAP40,ENSG00000124143,343578,Rho GTPase activating protein 40,,,,,,
ARHGAP42,ENSG00000165895,143872,Rho GTPase activating protein 42,,,,,,
ARHGAP44,ENSG00000006740,9912,Rho GTPase activating protein 44,,,,,,
ARHGDIB,ENSG00000111348,397,Rho GDP dissociation inhibitor beta,,,,,,
ARHGEF25,ENSG00000240771,115557,Rho guanine nucleotide exchange factor 25,,,,,,
ARHGEF39,ENSG00000137135,84904,Rho guanine nucleotide exchange factor 39,,,,,,
ARHGEF5,ENSG00000050327,7984,Rho guanine nucleotide exchange factor 5,,,,,,
ARID3B,ENSG00000179361,10620,AT-rich interaction domain 3B,,,,,,
ARID5A,ENSG00000196843,10865,AT-rich interaction domain 5A,,,,,,
ARID5B,ENSG00000150347,84159,AT-rich interaction domain 5B,,,,,,
ARL4C,ENSG00000188042,10123,ADP ribosylation factor like GTPase 4C,,,,,,
ARMCX1,ENSG00000126947,51309,armadillo repeat containing X-linked 1,,,,,,
ARNT2,ENSG00000172379,9915,aryl hydrocarbon receptor nuclear translocator 2,,,,,,
ARPC1B,ENSG00000130429,10095,actin related protein 2/3 complex subunit 1B,,,,,,
ARPC3,ENSG00000111229,10094,actin related protein 2/3 complex subunit 3,,,,,,
ARRDC3,ENSG00000113369,57561,arrestin domain containing 3,,,,,,
ARSB,ENSG00000113273,411,arylsulfatase B,,,,,,
ASNS,ENSG00000070669,440,asparagine synthetase (glutamine-hydrolyzing),,,,,,
ASPN,ENSG00000106819,54829,asporin,,,,,,
ATIC,ENSG00000138363,471,5-aminoimidazole-4-carboxamide ribonucleotide formyltransferase/IMP cyclohydrolase,,,,,,
ATOH8,ENSG00000168874,84913,atonal bHLH transcription factor 8,,,,,,
ATP10B,ENSG00000118322,23120,ATPase phospholipid transporting 10B (putative),,,,,,
ATP6V1B1,ENSG00000116039,525,ATPase H+ transporting V1 subunit B1,,,,,,
ATP8B4,ENSG00000104043,79895,ATPase phospholipid transporting 8B4 (putative),,,,,,
AVPR1A,ENSG00000166148,552,arginine vasopressin receptor 1A,,,,,,
B3GALT2,ENSG00000162630,8707,"beta-1,3-galactosyltransferase 2",,,,,,
B3GALT6,ENSG00000176022,126792,"beta-1,3-galactosyltransferase 6",,,,,,
B3GNT7,ENSG00000156966,93010,"UDP-GlcNAc:betaGal beta-1,3-N-acetylglucosaminyltransferase 7",,,,,,
B3GNT8,ENSG00000177191,374907,"UDP-GlcNAc:betaGal beta-1,3-N-acetylglucosaminyltransferase 8",,,,,,
B3GNTL1,ENSG00000175711,146712,"UDP-GlcNAc:betaGal beta-1,3-N-acetylglucosaminyltransferase like 1",,,,,,
BAG2,ENSG00000112208,9532,BCL2 associated athanogene 2,,,,,,
BAIAP2,ENSG00000175866,10458,BAR/IMD domain containing adaptor protein 2,,,,,,
BAK1,ENSG00000030110,578,BCL2 antagonist/killer 1,,,,,,
BASP1,ENSG00000176788,10409,brain abundant membrane attached signal protein 1,,,,,,
BAX,ENSG00000087088,581,"BCL2 associated X, apoptosis regulator",,,,,,
BCL2L11,ENSG00000153094,10018,BCL2 like 11,,,,,,
BCL3,ENSG00000069399,602,BCL3 transcription coactivator,,,,,,
BCL6,ENSG00000113916,604,BCL6 transcription repressor,,,,,,
BCL7A,ENSG00000110987,605,BAF chromatin remodeling complex subunit BCL7A,,,,,,
BCL9L,ENSG00000186174,283149,BCL9 like,,,,,,
BDKRB1,ENSG00000100739,623,bradykinin receptor B1,,,,,,
BEAN1,ENSG00000166546,146227,brain expressed associated with NEDD4 1,,,,,,
BEND6,ENSG00000151917,221336,BEN domain containing 6,,,,,,
BEST1,ENSG00000167995,7439,bestrophin 1,,,,,,
BEX2,ENSG00000133134,84707,brain expressed X-linked 2,,,,,,
BHLHE40,ENSG00000134107,8553,basic helix-loop-helix family member e40,,,,,,
BHLHE41,ENSG00000123095,79365,basic helix-loop-helix family member e41,,,,,,
BICD1,ENSG00000151746,636,BICD cargo adaptor 1,,,,,,
BIN2,ENSG00000110934,51411,bridging integrator 2,,,,,,
BIRC3,ENSG00000023445,330,baculoviral IAP repeat containing 3,,,,,,
BMPR1B,ENSG00000138696,658,bone morphogenetic protein receptor type 1B,,,,,,
BNC1,ENSG00000169594,646,basonuclin 1,,,,,,
BST2,ENSG00000130303,684,bone marrow stromal cell antigen 2,,,,,,
BTG1,ENSG00000133639,694,BTG anti-proliferation factor 1,,,,,,
BTG2,ENSG00000159388,7832,BTG anti-proliferation factor 2,,,,,,
BTG3,ENSG00000154640,10950,BTG anti-proliferation factor 3,,,,,,
C1QTNF2,ENSG00000145861,114898,C1q and TNF related 2,,,,,,
C1QTNF3,ENSG00000082196,114899,C1q and TNF related 3,,,,,,
C2CD4B,ENSG00000205502,388125,C2 calcium dependent domain containing 4B,,,,,,
C9,ENSG00000113600,735,complement C9,,,,,,
CACNA1A,ENSG00000141837,773,calcium voltage-gated channel subunit alpha1 A,,,,,,
CACNA1G,ENSG00000006283,8913,calcium voltage-gated channel subunit alpha1 G,,,,,,
CACNA1H,ENSG00000196557,8912,calcium voltage-gated channel subunit alpha1 H,,,,,,
CADM4,ENSG00000105767,199731,cell adhesion molecule 4,,,,,,
CADPS,ENSG00000163618,8618,calcium dependent secretion activator,,,,,,
CAMK2A,ENSG00000070808,815,calcium/calmodulin dependent protein kinase II alpha,,,,,,
CAMK2B,ENSG00000058404,816,calcium/calmodulin dependent protein kinase II beta,,,,,,
CAMK2N2,ENSG00000163888,94032,calcium/calmodulin dependent protein kinase II inhibitor 2,,,,,,
CAMKK2,ENSG00000110931,10645,calcium/calmodulin dependent protein kinase kinase 2,,,,,,
CAP2,ENSG00000112186,10486,cyclase associated actin cytoskeleton regulatory protein 2,,,,,,
CAPN5,ENSG00000149260,726,calpain 5,,,,,,
CARD6,ENSG00000132357,84674,caspase recruitment domain family member 6,,,,,,
CASC1,ENSG00000118307,55259,cancer susceptibility 1,,,,,,
CASQ1,ENSG00000143318,844,calsequestrin 1,,,,,,
CASZ1,ENSG00000130940,54897,castor zinc finger 1,,,,,,
CBLB,ENSG00000114423,868,Cbl proto-oncogene B,,,,,,
CBX8,ENSG00000141570,57332,chromobox 8,,,,,,
CCBE1,ENSG00000183287,147372,collagen and calcium binding EGF domains 1,,,,,,
CCDC17,ENSG00000159588,149483,coiled-coil domain containing 17,,,,,,
CCDC80,ENSG00000091986,151887,coiled-coil domain containing 80,,,,,,
CCL28,ENSG00000151882,56477,C-C motif chemokine ligand 28,,,,,,
CCL3,ENSG00000277632,6348,C-C motif chemokine ligand 3,,,,,,
CCL4,ENSG00000275302,6351,C-C motif chemokine ligand 4,,,,,,
CCL5,ENSG00000271503,6352,C-C motif chemokine ligand 5,,,,,,
CCND1,ENSG00000110092,595,cyclin D1,,,,,,
CCND3,ENSG00000112576,896,cyclin D3,,,,,,
CCNL1,ENSG00000163660,57018,cyclin L1,,,,,,
CCR1,ENSG00000163823,1230,C-C motif chemokine receptor 1,,,,,,
CCT3,ENSG00000163468,7203,chaperonin containing TCP1 subunit 3,,,,,,
CCT5,ENSG00000150753,22948,chaperonin containing TCP1 subunit 5,,,,,,
CD109,ENSG00000156535,135228,CD109 molecule,,,,,,
CD22,ENSG00000012124,933,CD22 molecule,,,,,,
CD248,ENSG00000174807,57124,CD248 molecule,,,,,,
CD274,ENSG00000120217,29126,CD274 molecule,,,,,,
CD33,ENSG00000105383,945,CD33 molecule,,,,,,
CD53,ENSG00000143119,963,CD53 molecule,,,,,,
CD55,ENSG00000196352,1604,CD55 molecule (Cromer blood group),,,,,,
CD63,ENSG00000135404,967,CD63 molecule,,,,,,
CD69,ENSG00000110848,969,CD69 molecule,,,,,,
CD80,ENSG00000121594,941,CD80 molecule,,,,,,
CD81,ENSG00000110651,975,CD81 molecule,,,,,,
CD84,ENSG00000066294,8832,CD84 molecule,,,,,,
CD86,ENSG00000114013,942,CD86 molecule,,,,,,
CDC42BPG,ENSG00000171219,55561,CDC42 binding protein kinase gamma,,,,,,
CDC42EP2,ENSG00000149798,10435,CDC42 effector protein 2,,,,,,
CDH2,ENSG00000170558,1000,cadherin 2,,,,,,
CDK2AP2,ENSG00000167797,10263,cyclin dependent kinase 2 associated protein 2,,,,,,
CDK6,ENSG00000105810,1021,cyclin dependent kinase 6,,,,,,
CDKN1A,ENSG00000124762,1026,cyclin dependent kinase inhibitor 1A,,,,,,
CDKN1C,ENSG00000129757,1028,cyclin dependent kinase inhibitor 1C,,,,,,
CDKN2B,ENSG00000147883,1030,cyclin dependent kinase inhibitor 2B,,,,,,
CDR2L,ENSG00000109089,30850,cerebellar degeneration related protein 2 like,,,,,,
CDS1,ENSG00000163624,1040,CDP-diacylglycerol synthase 1,,,,,,
CEBPA,ENSG00000245848,1050,CCAAT enhancer binding protein alpha,,,,,,
CEBPB,ENSG00000172216,1051,CCAAT enhancer binding protein beta,,,,,,
CEBPD,ENSG00000221869,1052,CCAAT enhancer binding protein delta,,,,,,
CEBPZ,ENSG00000115816,10153,CCAAT enhancer binding protein zeta,,,,,,
CENPI,ENSG00000102384,2491,centromere protein I,,,,,,
CENPM,ENSG00000100162,79019,centromere protein M,,,,,,
CENPP,ENSG00000188312,401541,centromere protein P,,,,,,
CEP70,ENSG00000114107,80321,centrosomal protein 70,,,,,,
CERS4,ENSG00000090661,79603,ceramide synthase 4,,,,,,
CFL1,ENSG00000172757,1072,cofilin 1,,,,,,
CFLAR,ENSG00000003402,8837,CASP8 and FADD like apoptosis regulator,,,,,,
CHD5,ENSG00000116254,26038,chromodomain helicase DNA binding protein 5,,,,,,
CHDH,ENSG00000016391,55349,choline dehydrogenase,,,,,,
CHKA,ENSG00000110721,1119,choline kinase alpha,,,,,,
CHMP4C,ENSG00000164695,92421,charged multivesicular body protein 4C,,,,,,
CHN1,ENSG00000128656,1123,chimerin 1,,,,,,
CHRM3,ENSG00000133019,1131,cholinergic receptor muscarinic 3,,,,,,
CHRNA1,ENSG00000138435,1134,cholinergic receptor nicotinic alpha 1 subunit,,,,,,
CHRNE,ENSG00000108556,1145,cholinergic receptor nicotinic epsilon subunit,,,,,,
CHST11,ENSG00000171310,50515,carbohydrate sulfotransferase 11,,,,,,
CHST2,ENSG00000175040,9435,carbohydrate sulfotransferase 2,,,,,,
CHSY1,ENSG00000131873,22856,chondroitin sulfate synthase 1,,,,,,
CISH,ENSG00000114737,1154,cytokine inducible SH2 containing protein,,,,,,
CLDN5,ENSG00000184113,7122,claudin 5,,,,,,
CLEC10A,ENSG00000132514,10462,C-type lectin domain containing 10A,,,,,,
CLEC11A,ENSG00000105472,6320,C-type lectin domain containing 11A,,,,,,
CLEC3A,ENSG00000166509,10143,C-type lectin domain family 3 member A,,,,,,
CLEC3B,ENSG00000163815,7123,C-type lectin domain family 3 member B,,,,,,
CLEC5A,ENSG00000258227,23601,C-type lectin domain containing 5A,,,,,,
CLEC7A,ENSG00000172243,64581,C-type lectin domain containing 7A,,,,,,
CLIC3,ENSG00000169583,9022,chloride intracellular channel 3,,,,,,
CMC4,ENSG00000182712,100272147,C-X9-C motif containing 4,,,,,,
CNNM2,ENSG00000148842,54805,cyclin and CBS domain divalent metal cation transport mediator 2,,,,,,
CNR1,ENSG00000118432,1268,cannabinoid receptor 1,,,,,,
CNST,ENSG00000162852,163882,"consortin, connexin sorting protein",,,,,,
COBL,ENSG00000106078,23242,cordon-bleu WH2 repeat protein,,,,,,
COL10A1,ENSG00000123500,1300,collagen type X alpha 1 chain,,,,,,
COL11A1,ENSG00000060718,1301,collagen type XI alpha 1 chain,,,,,,
COL13A1,ENSG00000197467,1305,collagen type XIII alpha 1 chain,,,,,,
COL1A1,ENSG00000108821,1277,collagen type I alpha 1 chain,,,,,,
COL1A2,ENSG00000164692,1278,collagen type I alpha 2 chain,,,,,,
COL25A1,ENSG00000188517,84570,collagen type XXV alpha 1 chain,,,,,,
COL3A1,ENSG00000168542,1281,collagen type III alpha 1 chain,,,,,,
COL4A3,ENSG00000169031,1285,collagen type IV alpha 3 chain,,,,,,
COL5A1,ENSG00000130635,1289,collagen type V alpha 1 chain,,,,,,
COL5A3,ENSG00000080573,50509,collagen type V alpha 3 chain,,,,,,
COL6A1,ENSG00000142156,1291,collagen type VI alpha 1 chain,,,,,,
COL6A2,ENSG00000142173,1292,collagen type VI alpha 2 chain,,,,,,
COL6A6,ENSG00000206384,131873,collagen type VI alpha 6 chain,,,,,,
COL7A1,ENSG00000114270,1294,collagen type VII alpha 1 chain,,,,,,
COL8A2,ENSG00000171812,1296,collagen type VIII alpha 2 chain,,,,,,
CORO1A,ENSG00000102879,11151,coronin 1A,,,,,,
CPA4,ENSG00000128510,51200,carboxypeptidase A4,,,,,,
CPLX2,ENSG00000145920,10814,complexin 2,,,,,,
CPNE2,ENSG00000140848,221184,copine 2,,,,,,
CPNE8,ENSG00000139117,144402,copine 8,,,,,,
CRELD2,ENSG00000184164,79174,cysteine rich with EGF like domains 2,,,,,,
CRIP1,ENSG00000213145,1396,cysteine rich protein 1,,,,,,
CRIP2,ENSG00000182809,1397,cysteine rich protein 2,,,,,,
CRISPLD1,ENSG00000121005,83690,cysteine rich secretory protein LCCL domain containing 1,,,,,,
CRLF1,ENSG00000006016,9244,cytokine receptor like factor 1,,,,,,
CRTAC1,ENSG00000095713,55118,cartilage acidic protein 1,,,,,,
CRYL1,ENSG00000165475,51084,crystallin lambda 1,,,,,,
CSDC2,ENSG00000172346,27254,cold shock domain containing C2,,,,,,
CSF1,ENSG00000184371,1435,colony stimulating factor 1,,,,,,
CSNK1E,ENSG00000213923,1454,casein kinase 1 epsilon,,,,,,
CSRNP1,ENSG00000144655,64651,cysteine and serine rich nuclear protein 1,,,,,,
CSRP3,ENSG00000129170,8048,cysteine and glycine rich protein 3,,,,,,
CTCFL,ENSG00000124092,140690,CCCTC-binding factor like,,,,,,
CTNNAL1,ENSG00000119326,8727,catenin alpha like 1,,,,,,
CTNNBIP1,ENSG00000178585,56998,catenin beta interacting protein 1,,,,,,
CTSK,ENSG00000143387,1513,cathepsin K,,,,,,
CTSS,ENSG00000163131,1520,cathepsin S,,,,,,
CTSZ,ENSG00000101160,1522,cathepsin Z,,,,,,
CTTNBP2,ENSG00000077063,83992,cortactin binding protein 2,,,,,,
CUEDC1,ENSG00000180891,404093,CUE domain containing 1,,,,,,
CXCL1,ENSG00000163739,2919,C-X-C motif chemokine ligand 1,,,,,,
CXCL14,ENSG00000145824,9547,C-X-C motif chemokine ligand 14,,,,,,
CXCL16,ENSG00000161921,58191,C-X-C motif chemokine ligand 16,,,,,,
CXCR4,ENSG00000121966,7852,C-X-C motif chemokine receptor 4,,,,,,
CXXC4,ENSG00000168772,80319,CXXC finger protein 4,,,,,,
CXXC5,ENSG00000171604,51523,CXXC finger protein 5,,,,,,
CYB561,ENSG00000008283,1534,cytochrome b561,,,,,,
CYBA,ENSG00000051523,1535,cytochrome b-245 alpha chain,,,,,,
CYBB,ENSG00000165168,1536,cytochrome b-245 beta chain,,,,,,
CYCS,ENSG00000172115,54205,"cytochrome c, somatic",,,,,,
CYP2W1,ENSG00000073067,54905,cytochrome P450 family 2 subfamily W member 1,,,,,,
CYP7B1,ENSG00000172817,9420,cytochrome P450 family 7 subfamily B member 1,,,,,,
CYP8B1,ENSG00000180432,1582,cytochrome P450 family 8 subfamily B member 1,,,,,,
CYTH4,ENSG00000100055,27128,cytohesin 4,,,,,,
CYTIP,ENSG00000115165,9595,cytohesin 1 interacting protein,,,,,,
CYTL1,ENSG00000170891,54360,cytokine like 1,,,,,,
DAAM2,ENSG00000146122,23500,dishevelled associated activator of morphogenesis 2,,,,,,
DACH1,ENSG00000276644,1602,dachshund family transcription factor 1,,,,,,
DAGLA,ENSG00000134780,747,diacylglycerol lipase alpha,,,,,,
DCAF13,ENSG00000164934,25879,DDB1 and CUL4 associated factor 13,,,,,,
DCAF4,ENSG00000119599,26094,DDB1 and CUL4 associated factor 4,,,,,,
DDB2,ENSG00000134574,1643,damage specific DNA binding protein 2,,,,,,
DDIT4,ENSG00000168209,54541,DNA damage inducible transcript 4,,,,,,
DDIT4L,ENSG00000145358,115265,DNA damage inducible transcript 4 like,,,,,,
DDR2,ENSG00000162733,4921,discoidin domain receptor tyrosine kinase 2,,,,,,
DDX21,ENSG00000165732,9188,DExD-box helicase 21,,,,,,
DDX24,ENSG00000089737,57062,DEAD-box helicase 24,,,,,,
DDX27,ENSG00000124228,55661,DEAD-box helicase 27,,,,,,
DDX28,ENSG00000182810,55794,DEAD-box helicase 28,,,,,,
DENND3,ENSG00000105339,22898,DENN domain containing 3,,,,,,
DENND4A,ENSG00000174485,10260,DENN domain containing 4A,,,,,,
DEPDC1B,ENSG00000035499,55789,DEP domain containing 1B,,,,,,
DEPDC7,ENSG00000121690,91614,DEP domain containing 7,,,,,,
DERL3,ENSG00000099958,91319,derlin 3,,,,,,
DEXI,ENSG00000182108,28955,Dexi homolog,,,,,,
DGKB,ENSG00000136267,1607,diacylglycerol kinase beta,,,,,,
DGKI,ENSG00000157680,9162,diacylglycerol kinase iota,,,,,,
DHDH,ENSG00000104808,27294,dihydrodiol dehydrogenase,,,,,,
DHRS13,ENSG00000167536,147015,dehydrogenase/reductase 13,,,,,,
DIO2,ENSG00000211448,1734,iodothyronine deiodinase 2,,,,,,
DIS3,ENSG00000083520,22894,"DIS3 homolog, exosome endoribonuclease and 3'-5' exoribonuclease",,,,,,
DKK3,ENSG00000050165,27122,dickkopf WNT signaling pathway inhibitor 3,,,,,,
DLG3,ENSG00000082458,1741,discs large MAGUK scaffold protein 3,,,,,,
DMBT1,ENSG00000187908,1755,deleted in malignant brain tumors 1,,,,,,
DMP1,ENSG00000152592,1758,dentin matrix acidic phosphoprotein 1,,,,,,
DNAJB9,ENSG00000128590,4189,DnaJ heat shock protein family (Hsp40) member B9,,,,,,
DNAJC25,ENSG00000059769,548645,DnaJ heat shock protein family (Hsp40) member C25,,,,,,
DNAJC27,ENSG00000115137,51277,DnaJ heat shock protein family (Hsp40) member C27,,,,,,
DNAJC6,ENSG00000116675,9829,DnaJ heat shock protein family (Hsp40) member C6,,,,,,
DOCK10,ENSG00000135905,55619,dedicator of cytokinesis 10,,,,,,
DOCK6,ENSG00000130158,57572,dedicator of cytokinesis 6,,,,,,
DOK2,ENSG00000147443,9046,docking protein 2,,,,,,
DOK3,ENSG00000146094,79930,docking protein 3,,,,,,
DONSON,ENSG00000159147,29980,downstream neighbor of SON,,,,,,
DPH2,ENSG00000132768,1802,diphthamide biosynthesis 2,,,,,,
DPP4,ENSG00000197635,1803,dipeptidyl peptidase 4,,,,,,
DPT,ENSG00000143196,1805,dermatopontin,,,,,,
DRAM1,ENSG00000136048,55332,DNA damage regulated autophagy modulator 1,,,,,,
DSG2,ENSG00000046604,1829,desmoglein 2,,,,,,
DSG3,ENSG00000134757,1830,desmoglein 3,,,,,,
DSP,ENSG00000096696,1832,desmoplakin,,,,,,
DUOXA1,ENSG00000140254,90527,dual oxidase maturation factor 1,,,,,,
DUSP1,ENSG00000120129,1843,dual specificity phosphatase 1,,,,,,
DUSP15,ENSG00000149599,128853,dual specificity phosphatase 15,,,,,,
DUSP18,ENSG00000167065,150290,dual specificity phosphatase 18,,,,,,
DUSP2,ENSG00000158050,1844,dual specificity phosphatase 2,,,,,,
DUSP22,ENSG00000112679,56940,dual specificity phosphatase 22,,,,,,
DUSP28,ENSG00000188542,285193,dual specificity phosphatase 28,,,,,,
DUSP8,ENSG00000184545,1850,dual specificity phosphatase 8,,,,,,
DYNC1I1,ENSG00000158560,1780,dynein cytoplasmic 1 intermediate chain 1,,,,,,
DYRK3,ENSG00000143479,8444,dual specificity tyrosine phosphorylation regulated kinase 3,,,,,,
E2F4,ENSG00000205250,1874,E2F transcription factor 4,,,,,,
ECM2,ENSG00000106823,1842,extracellular matrix protein 2,,,,,,
EDAR,ENSG00000135960,10913,ectodysplasin A receptor,,,,,,
EEF1E1,ENSG00000124802,9521,eukaryotic translation elongation factor 1 epsilon 1,,,,,,
EFEMP1,ENSG00000115380,2202,EGF containing fibulin extracellular matrix protein 1,,,,,,
EFHD1,ENSG00000115468,80303,EF-hand domain family member D1,,,,,,
EFHD2,ENSG00000142634,79180,EF-hand domain family member D2,,,,,,
EFNA3,ENSG00000143590,1944,ephrin A3,,,,,,
EGFL6,ENSG00000198759,25975,EGF like domain multiple 6,,,,,,
EGR1,ENSG00000120738,1958,early growth response 1,,,,,,
EHD1,ENSG00000110047,10938,EH domain containing 1,,,,,,
EHD3,ENSG00000013016,30845,EH domain containing 3,,,,,,
EHF,ENSG00000135373,26298,ETS homologous factor,,,,,,
EIF4EBP1,ENSG00000187840,1978,eukaryotic translation initiation factor 4E binding protein 1,,,,,,
ELAC2,ENSG00000006744,60528,elaC ribonuclease Z 2,,,,,,
ELF3,ENSG00000163435,1999,E74 like ETS transcription factor 3,,,,,,
ELL,ENSG00000105656,8178,elongation factor for RNA polymerase II,,,,,,
ELL2,ENSG00000118985,22936,elongation factor for RNA polymerase II 2,,,,,,
ELMOD2,ENSG00000179387,255520,ELMO domain containing 2,,,,,,
ELMSAN1,ENSG00000156030,91748,ELM2 and Myb/SANT domain containing 1,,,,,,
ELN,ENSG00000049540,2006,elastin,,,,,,
ELOVL4,ENSG00000118402,6785,ELOVL fatty acid elongase 4,,,,,,
EMB,ENSG00000170571,133418,embigin,,,,,,
EMC9,ENSG00000100908,51016,ER membrane protein complex subunit 9,,,,,,
EMD,ENSG00000102119,2010,emerin,,,,,,
EMILIN2,ENSG00000132205,84034,elastin microfibril interfacer 2,,,,,,
ENC1,ENSG00000171617,8507,ectodermal-neural cortex 1,,,,,,
ENG,ENSG00000106991,2022,endoglin,,,,,,
ENO2,ENSG00000111674,2026,enolase 2,,,,,,
ENOX1,ENSG00000120658,55068,ecto-NOX disulfide-thiol exchanger 1,,,,,,
ENPP2,ENSG00000136960,5168,ectonucleotide pyrophosphatase/phosphodiesterase 2,,,,,,
EPHA1,ENSG00000146904,2041,EPH receptor A1,,,,,,
EPN3,ENSG00000049283,55040,epsin 3,,,,,,
EPS8L2,ENSG00000177106,64787,EPS8 like 2,,,,,,
EPSTI1,ENSG00000133106,94240,epithelial stromal interaction 1,,,,,,
ERRFI1,ENSG00000116285,54206,ERBB receptor feedback inhibitor 1,,,,,,
ESCO2,ENSG00000171320,157570,establishment of sister chromatid cohesion N-acetyltransferase 2,,,,,,
ESM1,ENSG00000164283,11082,endothelial cell specific molecule 1,,,,,,
ESPNL,ENSG00000144488,339768,espin like,,,,,,
ESRRG,ENSG00000196482,2104,estrogen related receptor gamma,,,,,,
ETNK2,ENSG00000143845,55224,ethanolamine kinase 2,,,,,,
ETS2,ENSG00000157557,2114,"ETS proto-oncogene 2, transcription factor",,,,,,
ETV3L,ENSG00000253831,440695,ETS variant transcription factor 3 like,,,,,,
EVA1C,ENSG00000166979,59271,eva-1 homolog C,,,,,,
EVI5L,ENSG00000142459,115704,ecotropic viral integration site 5 like,,,,,,
EVL,ENSG00000196405,51466,Enah/Vasp-like,,,,,,
EXPH5,ENSG00000110723,23086,exophilin 5,,,,,,
F5,ENSG00000198734,2153,coagulation factor V,,,,,,
F7,ENSG00000057593,2155,coagulation factor VII,,,,,,
F8,ENSG00000185010,2157,coagulation factor VIII,,,,,,
FAIM2,ENSG00000135472,23017,Fas apoptotic inhibitory molecule 2,,,,,,
FAM131A,ENSG00000175182,131408,family with sequence similarity 131 member A,,,,,,
FAM13A,ENSG00000138640,10144,family with sequence similarity 13 member A,,,,,,
FAM160A1,ENSG00000164142,729830,family with sequence similarity 160 member A1,,,,,,
FAM161B,ENSG00000156050,145483,FAM161 centrosomal protein B,,,,,,
FAM180A,ENSG00000189320,389558,family with sequence similarity 180 member A,,,,,,
FAM20A,ENSG00000108950,54757,FAM20A golgi associated secretory pathway pseudokinase,,,,,,
FAM83D,ENSG00000101447,81610,family with sequence similarity 83 member D,,,,,,
FAM83G,ENSG00000188522,644815,family with sequence similarity 83 member G,,,,,,
FANCD2,ENSG00000144554,2177,FA complementation group D2,,,,,,
FAP,ENSG00000078098,2191,fibroblast activation protein alpha,,,,,,
FASN,ENSG00000169710,2194,fatty acid synthase,,,,,,
FAT2,ENSG00000086570,2196,FAT atypical cadherin 2,,,,,,
FAT3,ENSG00000165323,120114,FAT atypical cadherin 3,,,,,,
FAT4,ENSG00000196159,79633,FAT atypical cadherin 4,,,,,,
FBLIM1,ENSG00000162458,54751,filamin binding LIM protein 1,,,,,,
FBLN5,ENSG00000140092,10516,fibulin 5,,,,,,
FBLN7,ENSG00000144152,129804,fibulin 7,,,,,,
FBXL16,ENSG00000127585,146330,F-box and leucine rich repeat protein 16,,,,,,
FBXO21,ENSG00000135108,23014,F-box protein 21,,,,,,
FBXO31,ENSG00000103264,79791,F-box protein 31,,,,,,
FCER1G,ENSG00000158869,2207,Fc fragment of IgE receptor Ig,,,,,,
FCGR2B,ENSG00000072694,2213,Fc fragment of IgG receptor IIb,,,,,,
FCRL5,ENSG00000143297,83416,Fc receptor like 5,,,,,,
FGD3,ENSG00000127084,89846,"FYVE, RhoGEF and PH domain containing 3",,,,,,
FGF1,ENSG00000113578,2246,fibroblast growth factor 1,,,,,,
FGF14,ENSG00000102466,2259,fibroblast growth factor 14,,,,,,
FGF18,ENSG00000156427,8817,fibroblast growth factor 18,,,,,,
FGF9,ENSG00000102678,2254,fibroblast growth factor 9,,,,,,
FGFBP3,ENSG00000174721,143282,fibroblast growth factor binding protein 3,,,,,,
FGFR4,ENSG00000160867,2264,fibroblast growth factor receptor 4,,,,,,
FGL2,ENSG00000127951,10875,fibrinogen like 2,,,,,,
FHDC1,ENSG00000137460,85462,FH2 domain containing 1,,,,,,
FHL2,ENSG00000115641,2274,four and a half LIM domains 2,,,,,,
FHL5,ENSG00000112214,9457,four and a half LIM domains 5,,,,,,
FHOD3,ENSG00000134775,80206,formin homology 2 domain containing 3,,,,,,
FIBIN,ENSG00000176971,387758,fin bud initiation factor homolog,,,,,,
FIGN,ENSG00000182263,55137,"fidgetin, microtubule severing factor",,,,,,
FLG,ENSG00000143631,2312,filaggrin,,,,,,
FLOT2,ENSG00000132589,2319,flotillin 2,,,,,,
FLRT3,ENSG00000125848,23767,fibronectin leucine rich transmembrane protein 3,,,,,,
FLT1,ENSG00000102755,2321,fms related tyrosine kinase 1,,,,,,
FMNL1,ENSG00000184922,752,formin like 1,,,,,,
FMO5,ENSG00000131781,2330,flavin containing dimethylaniline monoxygenase 5,,,,,,
FN3K,ENSG00000167363,64122,fructosamine 3 kinase,,,,,,
FNDC1,ENSG00000164694,84624,fibronectin type III domain containing 1,,,,,,
FNIP2,ENSG00000052795,57600,folliculin interacting protein 2,,,,,,
FOSL1,ENSG00000175592,8061,"FOS like 1, AP-1 transcription factor subunit",,,,,,
FOSL2,ENSG00000075426,2355,"FOS like 2, AP-1 transcription factor subunit",,,,,,
FOXC2,ENSG00000176692,2303,forkhead box C2,,,,,,
FOXD1,ENSG00000251493,2297,forkhead box D1,,,,,,
FOXD2,ENSG00000186564,2306,forkhead box D2,,,,,,
FOXD4,ENSG00000170122,2298,forkhead box D4,,,,,,
FOXJ1,ENSG00000129654,2302,forkhead box J1,,,,,,
FOXN3,ENSG00000053254,1112,forkhead box N3,,,,,,
FOXP2,ENSG00000128573,93986,forkhead box P2,,,,,,
FPGS,ENSG00000136877,2356,folylpolyglutamate synthase,,,,,,
FRMD7,ENSG00000165694,90167,FERM domain containing 7,,,,,,
FRS3,ENSG00000137218,10817,fibroblast growth factor receptor substrate 3,,,,,,
FSD2,ENSG00000186628,123722,fibronectin type III and SPRY domain containing 2,,,,,,
FSTL1,ENSG00000163430,11167,follistatin like 1,,,,,,
FUT2,ENSG00000176920,2524,fucosyltransferase 2,,,,,,
FXYD1,ENSG00000266964,5348,FXYD domain containing ion transport regulator 1,,,,,,
FXYD6,ENSG00000137726,53826,FXYD domain containing ion transport regulator 6,,,,,,
FXYD7,ENSG00000221946,53822,FXYD domain containing ion transport regulator 7,,,,,,
FZD1,ENSG00000157240,8321,frizzled class receptor 1,,,,,,
FZD7,ENSG00000155760,8324,frizzled class receptor 7,,,,,,
FZD8,ENSG00000177283,8325,frizzled class receptor 8,,,,,,
FZD9,ENSG00000188763,8326,frizzled class receptor 9,,,,,,
G0S2,ENSG00000123689,50486,G0/G1 switch 2,,,,,,
GAB2,ENSG00000033327,9846,GRB2 associated binding protein 2,,,,,,
GABRA4,ENSG00000109158,2557,gamma-aminobutyric acid type A receptor alpha4 subunit,,,,,,
GADD45A,ENSG00000116717,1647,growth arrest and DNA damage inducible alpha,,,,,,
GADD45B,ENSG00000099860,4616,growth arrest and DNA damage inducible beta,,,,,,
GAP43,ENSG00000172020,2596,growth associated protein 43,,,,,,
GAS1,ENSG00000180447,2619,growth arrest specific 1,,,,,,
GAS2L1,ENSG00000185340,10634,growth arrest specific 2 like 1,,,,,,
GBP2,ENSG00000162645,2634,guanylate binding protein 2,,,,,,
GCAT,ENSG00000100116,23464,glycine C-acetyltransferase,,,,,,
GCH1,ENSG00000131979,2643,GTP cyclohydrolase 1,,,,,,
GDF15,ENSG00000130513,9518,growth differentiation factor 15,,,,,,
GDPD3,ENSG00000102886,79153,glycerophosphodiester phosphodiesterase domain containing 3,,,,,,
GEMIN6,ENSG00000152147,79833,gem nuclear organelle associated protein 6,,,,,,
GFAP,ENSG00000131095,2670,glial fibrillary acidic protein,,,,,,
GFRA2,ENSG00000168546,2675,GDNF family receptor alpha 2,,,,,,
GGH,ENSG00000137563,8836,gamma-glutamyl hydrolase,,,,,,
GJA1,ENSG00000152661,2697,gap junction protein alpha 1,,,,,,
GJB3,ENSG00000188910,2707,gap junction protein beta 3,,,,,,
GLA,ENSG00000102393,2717,galactosidase alpha,,,,,,
GLI2,ENSG00000074047,2736,GLI family zinc finger 2,,,,,,
GLIPR1,ENSG00000139278,11010,GLI pathogenesis related 1,,,,,,
GLRB,ENSG00000109738,2743,glycine receptor beta,,,,,,
GLRX,ENSG00000173221,2745,glutaredoxin,,,,,,
GLUL,ENSG00000135821,2752,glutamate-ammonia ligase,,,,,,
GMFG,ENSG00000130755,9535,glia maturation factor gamma,,,,,,
GMPR,ENSG00000137198,2766,guanosine monophosphate reductase,,,,,,
GNG11,ENSG00000127920,2791,G protein subunit gamma 11,,,,,,
GNMT,ENSG00000124713,27232,glycine N-methyltransferase,,,,,,
GNPTAB,ENSG00000111670,79158,N-acetylglucosamine-1-phosphate transferase subunits alpha and beta,,,,,,
GPAM,ENSG00000119927,57678,"glycerol-3-phosphate acyltransferase, mitochondrial",,,,,,
GPCPD1,ENSG00000125772,56261,glycerophosphocholine phosphodiesterase 1,,,,,,
GPHA2,ENSG00000149735,170589,glycoprotein hormone subunit alpha 2,,,,,,
GPM6A,ENSG00000150625,2823,glycoprotein M6A,,,,,,
GPM6B,ENSG00000046653,2824,glycoprotein M6B,,,,,,
GPNMB,ENSG00000136235,10457,glycoprotein nmb,,,,,,
GPR146,ENSG00000164849,115330,G protein-coupled receptor 146,,,,,,
GPR156,ENSG00000175697,165829,G protein-coupled receptor 156,,,,,,
GPR157,ENSG00000180758,80045,G protein-coupled receptor 157,,,,,,
GPR171,ENSG00000174946,29909,G protein-coupled receptor 171,,,,,,
GPR27,ENSG00000170837,2850,G protein-coupled receptor 27,,,,,,
GPR65,ENSG00000140030,8477,G protein-coupled receptor 65,,,,,,
GPR85,ENSG00000164604,54329,G protein-coupled receptor 85,,,,,,
GPRASP2,ENSG00000158301,114928,G protein-coupled receptor associated sorting protein 2,,,,,,
GPRC5A,ENSG00000013588,9052,G protein-coupled receptor class C group 5 member A,,,,,,
GPSM1,ENSG00000160360,26086,G protein signaling modulator 1,,,,,,
GPX2,ENSG00000176153,2877,glutathione peroxidase 2,,,,,,
GPX4,ENSG00000167468,2879,glutathione peroxidase 4,,,,,,
GPX7,ENSG00000116157,2882,glutathione peroxidase 7,,,,,,
GRAMD1A,ENSG00000089351,57655,GRAM domain containing 1A,,,,,,
GRIA2,ENSG00000120251,2891,glutamate ionotropic receptor AMPA type subunit 2,,,,,,
GRIA3,ENSG00000125675,2892,glutamate ionotropic receptor AMPA type subunit 3,,,,,,
GRID2IP,ENSG00000215045,392862,Grid2 interacting protein,,,,,,
GRIK3,ENSG00000163873,2899,glutamate ionotropic receptor kainate type subunit 3,,,,,,
GRIK5,ENSG00000105737,2901,glutamate ionotropic receptor kainate type subunit 5,,,,,,
GRIN2A,ENSG00000183454,2903,glutamate ionotropic receptor NMDA type subunit 2A,,,,,,
GRIN2D,ENSG00000105464,2906,glutamate ionotropic receptor NMDA type subunit 2D,,,,,,
GSG1L,ENSG00000169181,146395,GSG1 like,,,,,,
GSTK1,ENSG00000197448,373156,glutathione S-transferase kappa 1,,,,,,
HAGHL,ENSG00000103253,84264,hydroxyacylglutathione hydrolase like,,,,,,
HAPLN3,ENSG00000140511,145864,hyaluronan and proteoglycan link protein 3,,,,,,
HAS2,ENSG00000170961,3037,hyaluronan synthase 2,,,,,,
HCK,ENSG00000101336,3055,"HCK proto-oncogene, Src family tyrosine kinase",,,,,,
HCLS1,ENSG00000180353,3059,hematopoietic cell-specific Lyn substrate 1,,,,,,
HCN1,ENSG00000164588,348980,hyperpolarization activated cyclic nucleotide gated potassium channel 1,,,,,,
HEATR3,ENSG00000155393,55027,HEAT repeat containing 3,,,,,,
HECTD3,ENSG00000126107,79654,HECT domain E3 ubiquitin protein ligase 3,,,,,,
HEPACAM2,ENSG00000188175,253012,HEPACAM family member 2,,,,,,
HEPH,ENSG00000089472,9843,hephaestin,,,,,,
HERC3,ENSG00000138641,8916,HECT and RLD domain containing E3 ubiquitin protein ligase 3,,,,,,
HEY2,ENSG00000135547,23493,hes related family bHLH transcription factor with YRPW motif 2,,,,,,
HILPDA,ENSG00000135245,29923,hypoxia inducible lipid droplet associated,,,,,,
HK2,ENSG00000159399,3099,hexokinase 2,,,,,,
HK3,ENSG00000160883,3101,hexokinase 3,,,,,,
HMGCS2,ENSG00000134240,3158,3-hydroxy-3-methylglutaryl-CoA synthase 2,,,,,,
HMOX1,ENSG00000100292,3162,heme oxygenase 1,,,,,,
HNRNPAB,ENSG00000197451,3182,heterogeneous nuclear ribonucleoprotein A/B,,,,,,
HOXA3,ENSG00000105997,3200,homeobox A3,,,,,,
HOXC4,ENSG00000198353,3221,homeobox C4,,,,,,
HOXC5,ENSG00000172789,3222,homeobox C5,,,,,,
HOXC6,ENSG00000197757,3223,homeobox C6,,,,,,
HPGDS,ENSG00000163106,27306,hematopoietic prostaglandin D synthase,,,,,,
HRCT1,ENSG00000196196,646962,histidine rich carboxyl terminus 1,,,,,,
HRNR,ENSG00000197915,388697,hornerin,,,,,,
HS3ST3B1,ENSG00000125430,9953,heparan sulfate-glucosamine 3-sulfotransferase 3B1,,,,,,
HSD17B13,ENSG00000170509,345275,hydroxysteroid 17-beta dehydrogenase 13,,,,,,
HSD17B7,ENSG00000132196,51478,hydroxysteroid 17-beta dehydrogenase 7,,,,,,
HSF4,ENSG00000102878,3299,heat shock transcription factor 4,,,,,,
HSP90AB1,ENSG00000096384,3326,heat shock protein 90 alpha family class B member 1,,,,,,
HSPA5,ENSG00000044574,3309,heat shock protein family A (Hsp70) member 5,,,,,,
HSPA8,ENSG00000109971,3312,heat shock protein family A (Hsp70) member 8,,,,,,
HSPA9,ENSG00000113013,3313,heat shock protein family A (Hsp70) member 9,,,,,,
HSPB7,ENSG00000173641,27129,heat shock protein family B (small) member 7,,,,,,
HSPE1,ENSG00000115541,3336,heat shock protein family E (Hsp10) member 1,,,,,,
HTATIP2,ENSG00000109854,10553,HIV-1 Tat interactive protein 2,,,,,,
HTRA3,ENSG00000170801,94031,HtrA serine peptidase 3,,,,,,
IBSP,ENSG00000029559,3381,integrin binding sialoprotein,,,,,,
ICAM1,ENSG00000090339,3383,intercellular adhesion molecule 1,,,,,,
ID2,ENSG00000115738,3398,inhibitor of DNA binding 2,,,,,,
IER2,ENSG00000160888,9592,immediate early response 2,,,,,,
IER3,ENSG00000137331,8870,immediate early response 3,,,,,,
IER5,ENSG00000162783,51278,immediate early response 5,,,,,,
IFFO2,ENSG00000169991,126917,intermediate filament family orphan 2,,,,,,
IFI44,ENSG00000137965,10561,interferon induced protein 44,,,,,,
IFIT1,ENSG00000185745,3434,interferon induced protein with tetratricopeptide repeats 1,,,,,,
IFIT2,ENSG00000119922,3433,interferon induced protein with tetratricopeptide repeats 2,,,,,,
IFRD1,ENSG00000006652,3475,interferon related developmental regulator 1,,,,,,
IGDCC4,ENSG00000103742,57722,immunoglobulin superfamily DCC subclass member 4,,,,,,
IGF1R,ENSG00000140443,3480,insulin like growth factor 1 receptor,,,,,,
IGF2BP3,ENSG00000136231,10643,insulin like growth factor 2 mRNA binding protein 3,,,,,,
IGFALS,ENSG00000099769,3483,insulin like growth factor binding protein acid labile subunit,,,,,,
IGFBP3,ENSG00000146674,3486,insulin like growth factor binding protein 3,,,,,,
IHH,ENSG00000163501,3549,Indian hedgehog signaling molecule,,,,,,
IKBIP,ENSG00000166130,121457,IKBKB interacting protein,,,,,,
IKBKE,ENSG00000263528,9641,inhibitor of nuclear factor kappa B kinase subunit epsilon,,,,,,
IKZF1,ENSG00000185811,10320,IKAROS family zinc finger 1,,,,,,
IKZF3,ENSG00000161405,22806,IKAROS family zinc finger 3,,,,,,
IL11,ENSG00000095752,3589,interleukin 11,,,,,,
IL15RA,ENSG00000134470,3601,interleukin 15 receptor subunit alpha,,,,,,
IL1B,ENSG00000125538,3553,interleukin 1 beta,,,,,,
IL21R,ENSG00000103522,50615,interleukin 21 receptor,,,,,,
IL27RA,ENSG00000104998,9466,interleukin 27 receptor subunit alpha,,,,,,
IL31RA,ENSG00000164509,133396,interleukin 31 receptor A,,,,,,
ILDR2,ENSG00000143195,387597,immunoglobulin like domain containing receptor 2,,,,,,
INHA,ENSG00000123999,3623,inhibin subunit alpha,,,,,,
INHBB,ENSG00000163083,3625,inhibin subunit beta B,,,,,,
INMT,ENSG00000241644,11185,indolethylamine N-methyltransferase,,,,,,
INPP5D,ENSG00000168918,3635,inositol polyphosphate-5-phosphatase D,,,,,,
INSC,ENSG00000188487,387755,INSC spindle orientation adaptor protein,,,,,,
IPMK,ENSG00000151151,253430,inositol polyphosphate multikinase,,,,,,
IRAK2,ENSG00000134070,3656,interleukin 1 receptor associated kinase 2,,,,,,
IRF1,ENSG00000125347,3659,interferon regulatory factor 1,,,,,,
IRF2,ENSG00000168310,3660,interferon regulatory factor 2,,,,,,
IRF4,ENSG00000137265,3662,interferon regulatory factor 4,,,,,,
IRF7,ENSG00000185507,3665,interferon regulatory factor 7,,,,,,
IRS2,ENSG00000185950,8660,insulin receptor substrate 2,,,,,,
ISG15,ENSG00000187608,9636,ISG15 ubiquitin like modifier,,,,,,
ISLR,ENSG00000129009,3671,immunoglobulin superfamily containing leucine rich repeat,,,,,,
ISYNA1,ENSG00000105655,51477,inositol-3-phosphate synthase 1,,,,,,
ITGA11,ENSG00000137809,22801,integrin subunit alpha 11,,,,,,
ITGA2B,ENSG00000005961,3674,integrin subunit alpha 2b,,,,,,
ITGA3,ENSG00000005884,3675,integrin subunit alpha 3,,,,,,
ITGA5,ENSG00000161638,3678,integrin subunit alpha 5,,,,,,
ITGAM,ENSG00000169896,3684,integrin subunit alpha M,,,,,,
ITGAV,ENSG00000138448,3685,integrin subunit alpha V,,,,,,
ITGAX,ENSG00000140678,3687,integrin subunit alpha X,,,,,,
ITGB2,ENSG00000160255,3689,integrin subunit beta 2,,,,,,
ITGB3,ENSG00000259207,3690,integrin subunit beta 3,,,,,,
ITGB8,ENSG00000105855,3696,integrin subunit beta 8,,,,,,
ITGBL1,ENSG00000198542,9358,integrin subunit beta like 1,,,,,,
ITM2A,ENSG00000078596,9452,integral membrane protein 2A,,,,,,
ITPKC,ENSG00000086544,80271,inositol-trisphosphate 3-kinase C,,,,,,
ITPRIP,ENSG00000148841,85450,"inositol 1,4,5-trisphosphate receptor interacting protein",,,,,,
IZUMO4,ENSG00000099840,113177,IZUMO family member 4,,,,,,
JAK1,ENSG00000162434,3716,Janus kinase 1,,,,,,
JAK3,ENSG00000105639,3718,Janus kinase 3,,,,,,
JMJD1C,ENSG00000171988,221037,jumonji domain containing 1C,,,,,,
JUNB,ENSG00000171223,3726,"JunB proto-oncogene, AP-1 transcription factor subunit",,,,,,
JUP,ENSG00000173801,3728,junction plakoglobin,,,,,,
KBTBD11,ENSG00000176595,9920,kelch repeat and BTB domain containing 11,,,,,,
KCNC1,ENSG00000129159,3746,potassium voltage-gated channel subfamily C member 1,,,,,,
KCNE4,ENSG00000152049,23704,potassium voltage-gated channel subfamily E regulatory subunit 4,,,,,,
KCNH2,ENSG00000055118,3757,potassium voltage-gated channel subfamily H member 2,,,,,,
KCNJ15,ENSG00000157551,3772,potassium inwardly rectifying channel subfamily J member 15,,,,,,
KCNK5,ENSG00000164626,8645,potassium two pore domain channel subfamily K member 5,,,,,,
KCNK7,ENSG00000173338,10089,potassium two pore domain channel subfamily K member 7,,,,,,
KCNS1,ENSG00000124134,3787,potassium voltage-gated channel modifier subfamily S member 1,,,,,,
KCNT2,ENSG00000162687,343450,potassium sodium-activated channel subfamily T member 2,,,,,,
KCTD9,ENSG00000104756,54793,potassium channel tetramerization domain containing 9,,,,,,
KDM6B,ENSG00000132510,23135,lysine demethylase 6B,,,,,,
KERA,ENSG00000139330,11081,keratocan,,,,,,
KHDRBS3,ENSG00000131773,10656,"KH RNA binding domain containing, signal transduction associated 3",,,,,,
KHK,ENSG00000138030,3795,ketohexokinase,,,,,,
KIF5A,ENSG00000155980,3798,kinesin family member 5A,,,,,,
KIF7,ENSG00000166813,374654,kinesin family member 7,,,,,,
KLB,ENSG00000134962,152831,klotho beta,,,,,,
KLC3,ENSG00000104892,147700,kinesin light chain 3,,,,,,
KLF4,ENSG00000136826,9314,Kruppel like factor 4,,,,,,
KLF9,ENSG00000119138,687,Kruppel like factor 9,,,,,,
KLHL13,ENSG00000003096,90293,kelch like family member 13,,,,,,
KLHL29,ENSG00000119771,114818,kelch like family member 29,,,,,,
KLHL34,ENSG00000185915,257240,kelch like family member 34,,,,,,
KLHL4,ENSG00000102271,56062,kelch like family member 4,,,,,,
KLHL41,ENSG00000239474,10324,kelch like family member 41,,,,,,
KRBA1,ENSG00000133619,84626,KRAB-A domain containing 1,,,,,,
KRT1,ENSG00000167768,3848,keratin 1,,,,,,
KRT2,ENSG00000172867,3849,keratin 2,,,,,,
KRT5,ENSG00000186081,3852,keratin 5,,,,,,
KRT7,ENSG00000135480,3855,keratin 7,,,,,,
KSR1,ENSG00000141068,8844,kinase suppressor of ras 1,,,,,,
LAMA2,ENSG00000196569,3908,laminin subunit alpha 2,,,,,,
LAMB1,ENSG00000091136,3912,laminin subunit beta 1,,,,,,
LAMB3,ENSG00000196878,3914,laminin subunit beta 3,,,,,,
LAMC3,ENSG00000050555,10319,laminin subunit gamma 3,,,,,,
LBH,ENSG00000213626,81606,LBH regulator of WNT signaling pathway,,,,,,
LCP1,ENSG00000136167,3936,lymphocyte cytosolic protein 1,,,,,,
LCP2,ENSG00000043462,3937,lymphocyte cytosolic protein 2,,,,,,
LDHA,ENSG00000134333,3939,lactate dehydrogenase A,,,,,,
LGALS9,ENSG00000168961,3965,galectin 9,,,,,,
LGI2,ENSG00000153012,55203,leucine rich repeat LGI family member 2,,,,,,
LIF,ENSG00000128342,3976,LIF interleukin 6 family cytokine,,,,,,
LIMS2,ENSG00000072163,55679,LIM zinc finger domain containing 2,,,,,,
LINGO1,ENSG00000169783,84894,leucine rich repeat and Ig domain containing 1,,,,,,
LIPN,ENSG00000204020,643418,lipase family member N,,,,,,
LLGL2,ENSG00000073350,3993,LLGL scribble cell polarity complex component 2,,,,,,
LMNB1,ENSG00000113368,4001,lamin B1,,,,,,
LMO1,ENSG00000166407,4004,LIM domain only 1,,,,,,
LOXL1,ENSG00000129038,4016,lysyl oxidase like 1,,,,,,
LOXL4,ENSG00000138131,84171,lysyl oxidase like 4,,,,,,
LPAR4,ENSG00000147145,2846,lysophosphatidic acid receptor 4,,,,,,
LPIN1,ENSG00000134324,23175,lipin 1,,,,,,
LPXN,ENSG00000110031,9404,leupaxin,,,,,,
LRIG1,ENSG00000144749,26018,leucine rich repeats and immunoglobulin like domains 1,,,,,,
LRP5,ENSG00000162337,4041,LDL receptor related protein 5,,,,,,
LRRC17,ENSG00000128606,10234,leucine rich repeat containing 17,,,,,,
LRRC32,ENSG00000137507,2615,leucine rich repeat containing 32,,,,,,
LRRC8D,ENSG00000171492,55144,leucine rich repeat containing 8 VRAC subunit D,,,,,,
LRRC8E,ENSG00000171017,80131,leucine rich repeat containing 8 VRAC subunit E,,,,,,
LRRC9,ENSG00000131951,341883,leucine rich repeat containing 9,,,,,,
LRRN1,ENSG00000175928,57633,leucine rich repeat neuronal 1,,,,,,
LRRN2,ENSG00000170382,10446,leucine rich repeat neuronal 2,,,,,,
LRRN4CL,ENSG00000177363,221091,LRRN4 C-terminal like,,,,,,
LTB4R2,ENSG00000213906,56413,leukotriene B4 receptor 2,,,,,,
LTBP4,ENSG00000090006,8425,latent transforming growth factor beta binding protein 4,,,,,,
LY6D,ENSG00000167656,8581,lymphocyte antigen 6 family member D,,,,,,
LYSMD2,ENSG00000140280,256586,LysM domain containing 2,,,,,,
LZTS2,ENSG00000107816,84445,leucine zipper tumor suppressor 2,,,,,,
MAFB,ENSG00000204103,9935,MAF bZIP transcription factor B,,,,,,
MAFF,ENSG00000185022,23764,MAF bZIP transcription factor F,,,,,,
MAFK,ENSG00000198517,7975,MAF bZIP transcription factor K,,,,,,
MAMDC2,ENSG00000165072,256691,MAM domain containing 2,,,,,,
MANF,ENSG00000145050,7873,mesencephalic astrocyte derived neurotrophic factor,,,,,,
MAP1A,ENSG00000166963,4130,microtubule associated protein 1A,,,,,,
MAP1B,ENSG00000131711,4131,microtubule associated protein 1B,,,,,,
MAP1LC3B,ENSG00000140941,81631,microtubule associated protein 1 light chain 3 beta,,,,,,
MAP3K9,ENSG00000006432,4293,mitogen-activated protein kinase kinase kinase 9,,,,,,
MAP9,ENSG00000164114,79884,microtubule associated protein 9,,,,,,
MAPK15,ENSG00000181085,225689,mitogen-activated protein kinase 15,,,,,,
MAPK8IP1,ENSG00000121653,9479,mitogen-activated protein kinase 8 interacting protein 1,,,,,,
MARCKS,ENSG00000277443,4082,myristoylated alanine rich protein kinase C substrate,,,,,,
MARCO,ENSG00000019169,8685,macrophage receptor with collagenous structure,,,,,,
MAT2A,ENSG00000168906,4144,methionine adenosyltransferase 2A,,,,,,
MATN4,ENSG00000124159,8785,matrilin 4,,,,,,
MCCC2,ENSG00000131844,64087,methylcrotonoyl-CoA carboxylase 2,,,,,,
MCL1,ENSG00000143384,4170,"MCL1 apoptosis regulator, BCL2 family member",,,,,,
MCM10,ENSG00000065328,55388,minichromosome maintenance 10 replication initiation factor,,,,,,
MCMDC2,ENSG00000178460,157777,minichromosome maintenance domain containing 2,,,,,,
MCTP2,ENSG00000140563,55784,multiple C2 and transmembrane domain containing 2,,,,,,
MDC1,ENSG00000137337,9656,mediator of DNA damage checkpoint 1,,,,,,
MDGA1,ENSG00000112139,266727,MAM domain containing glycosylphosphatidylinositol anchor 1,,,,,,
MED13L,ENSG00000123066,23389,mediator complex subunit 13L,,,,,,
MEDAG,ENSG00000102802,84935,mesenteric estrogen dependent adipogenesis,,,,,,
MEG3,ENSG00000214548,55384,maternally expressed 3,,,,,,
MEOX1,ENSG00000005102,4222,mesenchyme homeobox 1,,,,,,
MEST,ENSG00000106484,4232,mesoderm specific transcript,,,,,,
METAP1,ENSG00000164024,23173,methionyl aminopeptidase 1,,,,,,
MEX3B,ENSG00000183496,84206,mex-3 RNA binding family member B,,,,,,
MFAP2,ENSG00000117122,4237,microfibril associated protein 2,,,,,,
MFSD6,ENSG00000151690,54842,major facilitator superfamily domain containing 6,,,,,,
MFSD9,ENSG00000135953,84804,major facilitator superfamily domain containing 9,,,,,,
MGAT3,ENSG00000128268,4248,"beta-1,4-mannosyl-glycoprotein 4-beta-N-acetylglucosaminyltransferase",,,,,,
MGLL,ENSG00000074416,11343,monoglyceride lipase,,,,,,
MGST3,ENSG00000143198,4259,microsomal glutathione S-transferase 3,,,,,,
MID1,ENSG00000101871,4281,midline 1,,,,,,
MIDN,ENSG00000167470,90007,midnolin,,,,,,
MINK1,ENSG00000141503,50488,misshapen like kinase 1,,,,,,
MIR155HG,ENSG00000234883,114614,MIR155 host gene,,,,,,
MIR23B,ENSG00000207563,407011,microRNA 23b,,,,,,
MLXIP,ENSG00000175727,22877,MLX interacting protein,,,,,,
MMD,ENSG00000108960,23531,monocyte to macrophage differentiation associated,,,,,,
MMP11,ENSG00000099953,4320,matrix metallopeptidase 11,,,,,,
MMP13,ENSG00000137745,4322,matrix metallopeptidase 13,,,,,,
MMP19,ENSG00000123342,4327,matrix metallopeptidase 19,,,,,,
MMP28,ENSG00000271447,79148,matrix metallopeptidase 28,,,,,,
MMP3,ENSG00000149968,4314,matrix metallopeptidase 3,,,,,,
MMP8,ENSG00000118113,4317,matrix metallopeptidase 8,,,,,,
MMP9,ENSG00000100985,4318,matrix metallopeptidase 9,,,,,,
MN1,ENSG00000169184,4330,"MN1 proto-oncogene, transcriptional regulator",,,,,,
MOGAT1,ENSG00000124003,116255,monoacylglycerol O-acyltransferase 1,,,,,,
MOV10,ENSG00000155363,4343,Mov10 RISC complex RNA helicase,,,,,,
MPEG1,ENSG00000197629,219972,macrophage expressed 1,,,,,,
MPP3,ENSG00000161647,4356,membrane palmitoylated protein 3,,,,,,
MPST,ENSG00000128309,4357,mercaptopyruvate sulfurtransferase,,,,,,
MRC2,ENSG00000011028,9902,mannose receptor C type 2,,,,,,
MS4A4A,ENSG00000110079,51338,membrane spanning 4-domains A4A,,,,,,
MSR1,ENSG00000038945,4481,macrophage scavenger receptor 1,,,,,,
MSRB1,ENSG00000198736,51734,methionine sulfoxide reductase B1,,,,,,
MSRB3,ENSG00000174099,253827,methionine sulfoxide reductase B3,,,,,,
MSX1,ENSG00000163132,4487,msh homeobox 1,,,,,,
MSX2,ENSG00000120149,4488,msh homeobox 2,,,,,,
MTHFD1L,ENSG00000120254,25902,methylenetetrahydrofolate dehydrogenase (NADP+ dependent) 1 like,,,,,,
MTHFD2,ENSG00000065911,10797,"methylenetetrahydrofolate dehydrogenase (NADP+ dependent) 2, methenyltetrahydrofolate cyclohydrolase",,,,,,
MXD1,ENSG00000059728,4084,MAX dimerization protein 1,,,,,,
MYBPH,ENSG00000133055,4608,myosin binding protein H,,,,,,
MYC,ENSG00000136997,4609,"MYC proto-oncogene, bHLH transcription factor",,,,,,
MYH11,ENSG00000133392,4629,myosin heavy chain 11,,,,,,
MYLIP,ENSG00000007944,29116,myosin regulatory light chain interacting protein,,,,,,
MYLK4,ENSG00000145949,340156,myosin light chain kinase family member 4,,,,,,
MYO1F,ENSG00000142347,4542,myosin IF,,,,,,
MYO1H,ENSG00000174527,283446,myosin IH,,,,,,
MYO5A,ENSG00000197535,4644,myosin VA,,,,,,
MYO5B,ENSG00000167306,4645,myosin VB,,,,,,
MYO5C,ENSG00000128833,55930,myosin VC,,,,,,
MYO6,ENSG00000196586,4646,myosin VI,,,,,,
MYOC,ENSG00000034971,4653,myocilin,,,,,,
MYOM1,ENSG00000101605,8736,myomesin 1,,,,,,
MYOM3,ENSG00000142661,127294,myomesin 3,,,,,,
MYOZ3,ENSG00000164591,91977,myozenin 3,,,,,,
MYRIP,ENSG00000170011,25924,myosin VIIA and Rab interacting protein,,,,,,
MYZAP,ENSG00000263155,100820829,myocardial zonula adherens protein,,,,,,
NAA25,ENSG00000111300,80018,"N(alpha)-acetyltransferase 25, NatB auxiliary subunit",,,,,,
NAF1,ENSG00000145414,92345,nuclear assembly factor 1 ribonucleoprotein,,,,,,
NAGPA,ENSG00000103174,51172,N-acetylglucosamine-1-phosphodiester alpha-N-acetylglucosaminidase,,,,,,
NALCN,ENSG00000102452,259232,"sodium leak channel, non-selective",,,,,,
NAMPT,ENSG00000105835,10135,nicotinamide phosphoribosyltransferase,,,,,,
NCALD,ENSG00000104490,83988,neurocalcin delta,,,,,,
NCF2,ENSG00000116701,4688,neutrophil cytosolic factor 2,,,,,,
NCKAP1L,ENSG00000123338,3071,NCK associated protein 1 like,,,,,,
NCMAP,ENSG00000184454,400746,non-compact myelin associated protein,,,,,,
NCS1,ENSG00000107130,23413,neuronal calcium sensor 1,,,,,,
NDN,ENSG00000182636,4692,"necdin, MAGE family member",,,,,,
NDNF,ENSG00000173376,79625,neuron derived neurotrophic factor,,,,,,
NDP,ENSG00000124479,4693,norrin cystine knot growth factor NDP,,,,,,
NDRG2,ENSG00000165795,57447,NDRG family member 2,,,,,,
NDST3,ENSG00000164100,9348,N-deacetylase and N-sulfotransferase 3,,,,,,
NDUFAF3,ENSG00000178057,25915,NADH:ubiquinone oxidoreductase complex assembly factor 3,,,,,,
NECAB3,ENSG00000125967,63941,N-terminal EF-hand calcium binding protein 3,,,,,,
NEDD4L,ENSG00000049759,23327,NEDD4 like E3 ubiquitin protein ligase,,,,,,
NEIL3,ENSG00000109674,55247,nei like DNA glycosylase 3,,,,,,
NEK6,ENSG00000119408,10783,NIMA related kinase 6,,,,,,
NET1,ENSG00000173848,10276,neuroepithelial cell transforming 1,,,,,,
NETO2,ENSG00000171208,81831,neuropilin and tolloid like 2,,,,,,
NEXN,ENSG00000162614,91624,nexilin F-actin binding protein,,,,,,
NFAM1,ENSG00000235568,150372,NFAT activating protein with ITAM motif 1,,,,,,
NFE2,ENSG00000123405,4778,"nuclear factor, erythroid 2",,,,,,
NFIL3,ENSG00000165030,4783,"nuclear factor, interleukin 3 regulated",,,,,,
NFKB2,ENSG00000077150,4791,nuclear factor kappa B subunit 2,,,,,,
NFKBID,ENSG00000167604,84807,NFKB inhibitor delta,,,,,,
NFKBIE,ENSG00000146232,4794,NFKB inhibitor epsilon,,,,,,
NGF,ENSG00000134259,4803,nerve growth factor,,,,,,
NGFR,ENSG00000064300,4804,nerve growth factor receptor,,,,,,
NINJ1,ENSG00000131669,4814,ninjurin 1,,,,,,
NIP7,ENSG00000132603,51388,nucleolar pre-rRNA processing protein NIP7,,,,,,
NIPAL1,ENSG00000163293,152519,NIPA like domain containing 1,,,,,,
NIPAL3,ENSG00000001461,57185,NIPA like domain containing 3,,,,,,
NKAIN4,ENSG00000101198,128414,sodium/potassium transporting ATPase interacting 4,,,,,,
NKIRAS1,ENSG00000197885,28512,NFKB inhibitor interacting Ras like 1,,,,,,
NKX3-2,ENSG00000109705,579,NK3 homeobox 2,,,,,,
NLRP10,ENSG00000182261,338322,NLR family pyrin domain containing 10,,,,,,
NLRP12,ENSG00000142405,91662,NLR family pyrin domain containing 12,,,,,,
NLRP3,ENSG00000162711,114548,NLR family pyrin domain containing 3,,,,,,
NME1,ENSG00000239672,4830,NME/NM23 nucleoside diphosphate kinase 1,,,,,,
NNAT,ENSG00000053438,4826,neuronatin,,,,,,
NOD2,ENSG00000167207,64127,nucleotide binding oligomerization domain containing 2,,,,,,
NOL3,ENSG00000140939,8996,nucleolar protein 3,,,,,,
NOLC1,ENSG00000166197,9221,nucleolar and coiled-body phosphoprotein 1,,,,,,
NOP10,ENSG00000182117,55505,NOP10 ribonucleoprotein,,,,,,
NOP58,ENSG00000055044,51602,NOP58 ribonucleoprotein,,,,,,
NOS2,ENSG00000007171,4843,nitric oxide synthase 2,,,,,,
NOS3,ENSG00000164867,4846,nitric oxide synthase 3,,,,,,
NOTCH3,ENSG00000074181,4854,notch receptor 3,,,,,,
NOVA1,ENSG00000139910,4857,NOVA alternative splicing regulator 1,,,,,,
NPEPPS,ENSG00000141279,9520,aminopeptidase puromycin sensitive,,,,,,
NPM3,ENSG00000107833,10360,nucleophosmin/nucleoplasmin 3,,,,,,
NPNT,ENSG00000168743,255743,nephronectin,,,,,,
NPR3,ENSG00000113389,4883,natriuretic peptide receptor 3,,,,,,
NPTX2,ENSG00000106236,4885,neuronal pentraxin 2,,,,,,
NR1D1,ENSG00000126368,9572,nuclear receptor subfamily 1 group D member 1,,,,,,
NR3C2,ENSG00000151623,4306,nuclear receptor subfamily 3 group C member 2,,,,,,
NR4A1,ENSG00000123358,3164,nuclear receptor subfamily 4 group A member 1,,,,,,
NR4A2,ENSG00000153234,4929,nuclear receptor subfamily 4 group A member 2,,,,,,
NR4A3,ENSG00000119508,8013,nuclear receptor subfamily 4 group A member 3,,,,,,
NRARP,ENSG00000198435,441478,NOTCH regulated ankyrin repeat protein,,,,,,
NRP2,ENSG00000118257,8828,neuropilin 2,,,,,,
NRXN2,ENSG00000110076,9379,neurexin 2,,,,,,
NT5E,ENSG00000135318,4907,5'-nucleotidase ecto,,,,,,
NTMT1,ENSG00000148335,28989,N-terminal Xaa-Pro-Lys N-methyltransferase 1,,,,,,
NTN3,ENSG00000162068,4917,netrin 3,,,,,,
NTNG2,ENSG00000196358,84628,netrin G2,,,,,,
NUDCD1,ENSG00000120526,84955,NudC domain containing 1,,,,,,
NUP210L,ENSG00000143552,91181,nucleoporin 210 like,,,,,,
NUP98,ENSG00000110713,4928,nucleoporin 98,,,,,,
NXPH3,ENSG00000182575,11248,neurexophilin 3,,,,,,
NYAP1,ENSG00000166924,222950,neuronal tyrosine phosphorylated phosphoinositide-3-kinase adaptor 1,,,,,,
NYAP2,ENSG00000144460,57624,neuronal tyrosine-phosphorylated phosphoinositide-3-kinase adaptor 2,,,,,,
OAS2,ENSG00000111335,4939,2'-5'-oligoadenylate synthetase 2,,,,,,
OAS3,ENSG00000111331,4940,2'-5'-oligoadenylate synthetase 3,,,,,,
OBSCN,ENSG00000154358,84033,"obscurin, cytoskeletal calmodulin and titin-interacting RhoGEF",,,,,,
OCIAD2,ENSG00000145247,132299,OCIA domain containing 2,,,,,,
ODC1,ENSG00000115758,4953,ornithine decarboxylase 1,,,,,,
ODF3B,ENSG00000177989,440836,outer dense fiber of sperm tails 3B,,,,,,
OGFR,ENSG00000060491,11054,opioid growth factor receptor,,,,,,
OGN,ENSG00000106809,4969,osteoglycin,,,,,,
OLFM2,ENSG00000105088,93145,olfactomedin 2,,,,,,
OLFML3,ENSG00000116774,56944,olfactomedin like 3,,,,,,
OPHN1,ENSG00000079482,4983,oligophrenin 1,,,,,,
OPRL1,ENSG00000125510,4987,opioid related nociceptin receptor 1,,,,,,
OPTC,ENSG00000188770,26254,opticin,,,,,,
OSBPL3,ENSG00000070882,26031,oxysterol binding protein like 3,,,,,,
OSBPL5,ENSG00000021762,114879,oxysterol binding protein like 5,,,,,,
OSR2,ENSG00000164920,116039,odd-skipped related transciption factor 2,,,,,,
OSTC,ENSG00000198856,58505,oligosaccharyltransferase complex non-catalytic subunit,,,,,,
OTUB2,ENSG00000089723,78990,"OTU deubiquitinase, ubiquitin aldehyde binding 2",,,,,,
OTUD1,ENSG00000165312,220213,OTU deubiquitinase 1,,,,,,
P2RX6,ENSG00000099957,9127,purinergic receptor P2X 6,,,,,,
P2RY2,ENSG00000175591,5029,purinergic receptor P2Y2,,,,,,
P4HA3,ENSG00000149380,283208,prolyl 4-hydroxylase subunit alpha 3,,,,,,
PABPC4L,ENSG00000254535,132430,poly(A) binding protein cytoplasmic 4 like,,,,,,
PAK1IP1,ENSG00000111845,55003,PAK1 interacting protein 1,,,,,,
PAK3,ENSG00000077264,5063,p21 (RAC1) activated kinase 3,,,,,,
PALM,ENSG00000099864,5064,paralemmin,,,,,,
PANK1,ENSG00000152782,53354,pantothenate kinase 1,,,,,,
PAQR4,ENSG00000162073,124222,progestin and adipoQ receptor family member 4,,,,,,
PAQR5,ENSG00000137819,54852,progestin and adipoQ receptor family member 5,,,,,,
PARD6B,ENSG00000124171,84612,par-6 family cell polarity regulator beta,,,,,,
PATL1,ENSG00000166889,219988,"PAT1 homolog 1, processing body mRNA decay factor",,,,,,
PCCB,ENSG00000114054,5096,propionyl-CoA carboxylase subunit beta,,,,,,
PCDH10,ENSG00000138650,57575,protocadherin 10,,,,,,
PCDH18,ENSG00000189184,54510,protocadherin 18,,,,,,
PCK1,ENSG00000124253,5105,phosphoenolpyruvate carboxykinase 1,,,,,,
PCLO,ENSG00000186472,27445,piccolo presynaptic cytomatrix protein,,,,,,
PCNA,ENSG00000132646,5111,proliferating cell nuclear antigen,,,,,,
PCOLCE,ENSG00000106333,5118,procollagen C-endopeptidase enhancer,,,,,,
PCP4L1,ENSG00000248485,654790,Purkinje cell protein 4 like 1,,,,,,
PCSK6,ENSG00000140479,5046,proprotein convertase subtilisin/kexin type 6,,,,,,
PCTP,ENSG00000141179,58488,phosphatidylcholine transfer protein,,,,,,
PDCD1,ENSG00000188389,5133,programmed cell death 1,,,,,,
PDCD1LG2,ENSG00000197646,80380,programmed cell death 1 ligand 2,,,,,,
PDGFRL,ENSG00000104213,5157,platelet derived growth factor receptor like,,,,,,
PDK4,ENSG00000004799,5166,pyruvate dehydrogenase kinase 4,,,,,,
PDLIM4,ENSG00000131435,8572,PDZ and LIM domain 4,,,,,,
PDPN,ENSG00000162493,10630,podoplanin,,,,,,
PDZRN3,ENSG00000121440,23024,PDZ domain containing ring finger 3,,,,,,
PEG3,ENSG00000198300,5178,paternally expressed 3,,,,,,
PENK,ENSG00000181195,5179,proenkephalin,,,,,,
PER1,ENSG00000179094,5187,period circadian regulator 1,,,,,,
PFKFB1,ENSG00000158571,5207,"6-phosphofructo-2-kinase/fructose-2,6-biphosphatase 1",,,,,,
PFKFB3,ENSG00000170525,5209,"6-phosphofructo-2-kinase/fructose-2,6-biphosphatase 3",,,,,,
PFKFB4,ENSG00000114268,5210,"6-phosphofructo-2-kinase/fructose-2,6-biphosphatase 4",,,,,,
PFN1,ENSG00000108518,5216,profilin 1,,,,,,
PGLYRP1,ENSG00000008438,8993,peptidoglycan recognition protein 1,,,,,,
PGM2L1,ENSG00000165434,283209,phosphoglucomutase 2 like 1,,,,,,
PGRMC1,ENSG00000101856,10857,progesterone receptor membrane component 1,,,,,,
PHKA1,ENSG00000067177,5255,phosphorylase kinase regulatory subunit alpha 1,,,,,,
PHLDA2,ENSG00000181649,7262,pleckstrin homology like domain family A member 2,,,,,,
PHLDB3,ENSG00000176531,653583,pleckstrin homology like domain family B member 3,,,,,,
PIEZO2,ENSG00000154864,63895,piezo type mechanosensitive ion channel component 2,,,,,,
PIGW,ENSG00000277161,284098,phosphatidylinositol glycan anchor biosynthesis class W,,,,,,
PIK3AP1,ENSG00000155629,118788,phosphoinositide-3-kinase adaptor protein 1,,,,,,
PIK3C2G,ENSG00000139144,5288,phosphatidylinositol-4-phosphate 3-kinase catalytic subunit type 2 gamma,,,,,,
PIK3CD,ENSG00000171608,5293,"phosphatidylinositol-4,5-bisphosphate 3-kinase catalytic subunit delta",,,,,,
PIK3R3,ENSG00000117461,8503,phosphoinositide-3-kinase regulatory subunit 3,,,,,,
PIK3R5,ENSG00000141506,23533,phosphoinositide-3-kinase regulatory subunit 5,,,,,,
PIM1,ENSG00000137193,5292,"Pim-1 proto-oncogene, serine/threonine kinase",,,,,,
PIM2,ENSG00000102096,11040,"Pim-2 proto-oncogene, serine/threonine kinase",,,,,,
PIM3,ENSG00000198355,415116,"Pim-3 proto-oncogene, serine/threonine kinase",,,,,,
PINX1,ENSG00000254093,54984,PIN2 (TERF1) interacting telomerase inhibitor 1,,,,,,
PITPNC1,ENSG00000154217,26207,phosphatidylinositol transfer protein cytoplasmic 1,,,,,,
PITPNM3,ENSG00000091622,83394,PITPNM family member 3,,,,,,
PITX1,ENSG00000069011,5307,paired like homeodomain 1,,,,,,
PIWIL2,ENSG00000197181,55124,piwi like RNA-mediated gene silencing 2,,,,,,
PKD1,ENSG00000008710,5310,"polycystin 1, transient receptor potential channel interacting",,,,,,
PKM,ENSG00000067225,5315,pyruvate kinase M1/2,,,,,,
PLA2G2A,ENSG00000188257,5320,phospholipase A2 group IIA,,,,,,
PLAUR,ENSG00000011422,5329,"plasminogen activator, urokinase receptor",,,,,,
PLBD1,ENSG00000121316,79887,phospholipase B domain containing 1,,,,,,
PLCB4,ENSG00000101333,5332,phospholipase C beta 4,,,,,,
PLD1,ENSG00000075651,5337,phospholipase D1,,,,,,
PLD4,ENSG00000166428,122618,phospholipase D family member 4,,,,,,
PLEK,ENSG00000115956,5341,pleckstrin,,,,,,
PLEK2,ENSG00000100558,26499,pleckstrin 2,,,,,,
PLEKHF1,ENSG00000166289,79156,pleckstrin homology and FYVE domain containing 1,,,,,,
PLEKHG4,ENSG00000196155,25894,pleckstrin homology and RhoGEF domain containing G4,,,,,,
PLEKHN1,ENSG00000187583,84069,pleckstrin homology domain containing N1,,,,,,
PLK2,ENSG00000145632,10769,polo like kinase 2,,,,,,
PLK3,ENSG00000173846,1263,polo like kinase 3,,,,,,
PLOD3,ENSG00000106397,8985,"procollagen-lysine,2-oxoglutarate 5-dioxygenase 3",,,,,,
PLXDC1,ENSG00000161381,57125,plexin domain containing 1,,,,,,
PM20D1,ENSG00000162877,148811,peptidase M20 domain containing 1,,,,,,
PMEL,ENSG00000185664,6490,premelanosome protein,,,,,,
PNP,ENSG00000198805,4860,purine nucleoside phosphorylase,,,,,,
PNRC1,ENSG00000146278,10957,proline rich nuclear receptor coactivator 1,,,,,,
PODN,ENSG00000174348,127435,podocan,,,,,,
POLG2,ENSG00000256525,11232,"DNA polymerase gamma 2, accessory subunit",,,,,,
POLR1B,ENSG00000125630,84172,RNA polymerase I subunit B,,,,,,
POLR1E,ENSG00000137054,64425,RNA polymerase I subunit E,,,,,,
POP1,ENSG00000104356,10940,"POP1 homolog, ribonuclease P/MRP subunit",,,,,,
POPDC2,ENSG00000121577,64091,popeye domain containing 2,,,,,,
POU2F2,ENSG00000028277,5452,POU class 2 homeobox 2,,,,,,
POU2F3,ENSG00000137709,25833,POU class 2 homeobox 3,,,,,,
PPARD,ENSG00000112033,5467,peroxisome proliferator activated receptor delta,,,,,,
PPARGC1A,ENSG00000109819,10891,PPARG coactivator 1 alpha,,,,,,
PPFIA3,ENSG00000177380,8541,PTPRF interacting protein alpha 3,,,,,,
PPFIA4,ENSG00000143847,8497,PTPRF interacting protein alpha 4,,,,,,
PPFIBP1,ENSG00000110841,8496,PPFIA binding protein 1,,,,,,
PPM1J,ENSG00000155367,333926,"protein phosphatase, Mg2+/Mn2+ dependent 1J",,,,,,
PPME1,ENSG00000214517,51400,protein phosphatase methylesterase 1,,,,,,
PPP1R13B,ENSG00000088808,23368,protein phosphatase 1 regulatory subunit 13B,,,,,,
PPP1R15A,ENSG00000087074,23645,protein phosphatase 1 regulatory subunit 15A,,,,,,
PPP1R15B,ENSG00000158615,84919,protein phosphatase 1 regulatory subunit 15B,,,,,,
PPP1R27,ENSG00000182676,116729,protein phosphatase 1 regulatory subunit 27,,,,,,
PPP1R3B,ENSG00000173281,79660,protein phosphatase 1 regulatory subunit 3B,,,,,,
PPP1R3G,ENSG00000219607,648791,protein phosphatase 1 regulatory subunit 3G,,,,,,
PPP1R9A,ENSG00000158528,55607,protein phosphatase 1 regulatory subunit 9A,,,,,,
PRADC1,ENSG00000135617,84279,protease associated domain containing 1,,,,,,
PRCD,ENSG00000214140,768206,photoreceptor disc component,,,,,,
PRDM16,ENSG00000142611,63976,PR/SET domain 16,,,,,,
PRKAG2,ENSG00000106617,51422,protein kinase AMP-activated non-catalytic subunit gamma 2,,,,,,
PRKAG3,ENSG00000115592,53632,protein kinase AMP-activated non-catalytic subunit gamma 3,,,,,,
PRKAR2B,ENSG00000005249,5577,protein kinase cAMP-dependent type II regulatory subunit beta,,,,,,
PRLR,ENSG00000113494,5618,prolactin receptor,,,,,,
PRMT6,ENSG00000198890,55170,protein arginine methyltransferase 6,,,,,,
PROSER2,ENSG00000148426,254427,proline and serine rich 2,,,,,,
PROZ,ENSG00000126231,8858,"protein Z, vitamin K dependent plasma glycoprotein",,,,,,
PRR16,ENSG00000184838,51334,proline rich 16,,,,,,
PRRG3,ENSG00000130032,79057,proline rich and Gla domain 3,,,,,,
PRSS12,ENSG00000164099,8492,serine protease 12,,,,,,
PRSS27,ENSG00000172382,83886,serine protease 27,,,,,,
PSMB8,ENSG00000204264,5696,proteasome 20S subunit beta 8,,,,,,
PSRC1,ENSG00000134222,84722,proline and serine rich coiled-coil 1,,,,,,
PTAFR,ENSG00000169403,5724,platelet activating factor receptor,,,,,,
PTGER3,ENSG00000050628,5733,prostaglandin E receptor 3,,,,,,
PTGER4,ENSG00000171522,5734,prostaglandin E receptor 4,,,,,,
PTGES,ENSG00000148344,9536,prostaglandin E synthase,,,,,,
PTGES2,ENSG00000148334,80142,prostaglandin E synthase 2,,,,,,
PTGS1,ENSG00000095303,5742,prostaglandin-endoperoxide synthase 1,,,,,,
PTGS2,ENSG00000073756,5743,prostaglandin-endoperoxide synthase 2,,,,,,
PTHLH,ENSG00000087494,5744,parathyroid hormone like hormone,,,,,,
PTK7,ENSG00000112655,5754,protein tyrosine kinase 7 (inactive),,,,,,
PTN,ENSG00000105894,5764,pleiotrophin,,,,,,
PTPN22,ENSG00000134242,26191,protein tyrosine phosphatase non-receptor type 22,,,,,,
PTPRC,ENSG00000081237,5788,protein tyrosine phosphatase receptor type C,,,,,,
PTPRJ,ENSG00000149177,5795,protein tyrosine phosphatase receptor type J,,,,,,
PTPRO,ENSG00000151490,5800,protein tyrosine phosphatase receptor type O,,,,,,
PTPRU,ENSG00000060656,10076,protein tyrosine phosphatase receptor type U,,,,,,
PUS1,ENSG00000177192,80324,pseudouridine synthase 1,,,,,,
PVR,ENSG00000073008,5817,PVR cell adhesion molecule,,,,,,
PXK,ENSG00000168297,54899,PX domain containing serine/threonine kinase like,,,,,,
PXN,ENSG00000089159,5829,paxillin,,,,,,
PYCR1,ENSG00000183010,5831,pyrroline-5-carboxylate reductase 1,,,,,,
PYGL,ENSG00000100504,5836,glycogen phosphorylase L,,,,,,
RAB11FIP1,ENSG00000156675,80223,RAB11 family interacting protein 1,,,,,,
RAB20,ENSG00000139832,55647,"RAB20, member RAS oncogene family",,,,,,
RAB26,ENSG00000167964,25837,"RAB26, member RAS oncogene family",,,,,,
RAB27B,ENSG00000041353,5874,"RAB27B, member RAS oncogene family",,,,,,
RAB31,ENSG00000168461,11031,"RAB31, member RAS oncogene family",,,,,,
RAB37,ENSG00000172794,326624,"RAB37, member RAS oncogene family",,,,,,
RAB38,ENSG00000123892,23682,"RAB38, member RAS oncogene family",,,,,,
RAB3B,ENSG00000169213,5865,"RAB3B, member RAS oncogene family",,,,,,
RAB3D,ENSG00000105514,9545,"RAB3D, member RAS oncogene family",,,,,,
RAB3IL1,ENSG00000167994,5866,RAB3A interacting protein like 1,,,,,,
RAB44,ENSG00000255587,401258,"RAB44, member RAS oncogene family",,,,,,
RAB5C,ENSG00000108774,5878,"RAB5C, member RAS oncogene family",,,,,,
RAC2,ENSG00000128340,5880,Rac family small GTPase 2,,,,,,
RAD51D,ENSG00000185379,5892,RAD51 paralog D,,,,,,
RADIL,ENSG00000157927,55698,Rap associating with DIL domain,,,,,,
RAET1E,ENSG00000164520,135250,retinoic acid early transcript 1E,,,,,,
RALGDS,ENSG00000160271,5900,ral guanine nucleotide dissociation stimulator,,,,,,
RAMP1,ENSG00000132329,10267,receptor activity modifying protein 1,,,,,,
RAMP3,ENSG00000122679,10268,receptor activity modifying protein 3,,,,,,
RAP1GAP,ENSG00000076864,5909,RAP1 GTPase activating protein,,,,,,
RAPGEFL1,ENSG00000108352,51195,Rap guanine nucleotide exchange factor like 1,,,,,,
RAPSN,ENSG00000165917,5913,receptor associated protein of the synapse,,,,,,
RARRES1,ENSG00000118849,5918,retinoic acid receptor responder 1,,,,,,
RASD1,ENSG00000108551,51655,ras related dexamethasone induced 1,,,,,,
RASL12,ENSG00000103710,51285,RAS like family 12,,,,,,
RASSF1,ENSG00000068028,11186,Ras association domain family member 1,,,,,,
RASSF7,ENSG00000099849,8045,Ras association domain family member 7,,,,,,
RBBP8,ENSG00000101773,5932,"RB binding protein 8, endonuclease",,,,,,
RBM24,ENSG00000112183,221662,RNA binding motif protein 24,,,,,,
RBM45,ENSG00000155636,129831,RNA binding motif protein 45,,,,,,
RBMS3,ENSG00000144642,27303,RNA binding motif single stranded interacting protein 3,,,,,,
RBPMS2,ENSG00000166831,348093,"RNA binding protein, mRNA processing factor 2",,,,,,
RCAN1,ENSG00000159200,1827,regulator of calcineurin 1,,,,,,
RCOR2,ENSG00000167771,283248,REST corepressor 2,,,,,,
RCOR3,ENSG00000117625,55758,REST corepressor 3,,,,,,
RDH11,ENSG00000072042,51109,retinol dehydrogenase 11,,,,,,
REEP1,ENSG00000068615,65055,receptor accessory protein 1,,,,,,
REEP6,ENSG00000115255,92840,receptor accessory protein 6,,,,,,
REL,ENSG00000162924,5966,"REL proto-oncogene, NF-kB subunit",,,,,,
RELB,ENSG00000104856,5971,"RELB proto-oncogene, NF-kB subunit",,,,,,
RELT,ENSG00000054967,84957,RELT TNF receptor,,,,,,
REM1,ENSG00000088320,28954,RRAD and GEM like GTPase 1,,,,,,
RERG,ENSG00000134533,85004,RAS like estrogen regulated growth inhibitor,,,,,,
RGMA,ENSG00000182175,56963,repulsive guidance molecule BMP co-receptor a,,,,,,
RGS1,ENSG00000090104,5996,regulator of G protein signaling 1,,,,,,
RGS11,ENSG00000076344,8786,regulator of G protein signaling 11,,,,,,
RGS16,ENSG00000143333,6004,regulator of G protein signaling 16,,,,,,
RGS2,ENSG00000116741,5997,regulator of G protein signaling 2,,,,,,
RGS6,ENSG00000182732,9628,regulator of G protein signaling 6,,,,,,
RGS9BP,ENSG00000186326,388531,regulator of G protein signaling 9 binding protein,,,,,,
RHBDL2,ENSG00000158315,54933,rhomboid like 2,,,,,,
RHOH,ENSG00000168421,399,ras homolog family member H,,,,,,
RHOJ,ENSG00000126785,57381,ras homolog family member J,,,,,,
RHOU,ENSG00000116574,58480,ras homolog family member U,,,,,,
RHPN2,ENSG00000131941,85415,rhophilin Rho GTPase binding protein 2,,,,,,
RIMS4,ENSG00000101098,140730,regulating synaptic membrane exocytosis 4,,,,,,
RIOK3,ENSG00000101782,8780,RIO kinase 3,,,,,,
RIPK1,ENSG00000137275,8737,receptor interacting serine/threonine kinase 1,,,,,,
RIPK3,ENSG00000129465,11035,receptor interacting serine/threonine kinase 3,,,,,,
RLF,ENSG00000117000,6018,rearranged L-myc fusion,,,,,,
RLIM,ENSG00000131263,51132,"ring finger protein, LIM domain interacting",,,,,,
RMI2,ENSG00000175643,116028,RecQ mediated genome instability 2,,,,,,
RND1,ENSG00000172602,27289,Rho family GTPase 1,,,,,,
RNF157,ENSG00000141576,114804,ring finger protein 157,,,,,,
RNF180,ENSG00000164197,285671,ring finger protein 180,,,,,,
RNF182,ENSG00000180537,221687,ring finger protein 182,,,,,,
RNF39,ENSG00000204618,80352,ring finger protein 39,,,,,,
RNFT2,ENSG00000135119,84900,"ring finger protein, transmembrane 2",,,,,,
ROBO2,ENSG00000185008,6092,roundabout guidance receptor 2,,,,,,
ROR2,ENSG00000169071,4920,receptor tyrosine kinase like orphan receptor 2,,,,,,
RORA,ENSG00000069667,6095,RAR related orphan receptor A,,,,,,
RPGRIP1L,ENSG00000103494,23322,RPGRIP1 like,,,,,,
RPP40,ENSG00000124787,10799,ribonuclease P/MRP subunit p40,,,,,,
RPS6KA5,ENSG00000100784,9252,ribosomal protein S6 kinase A5,,,,,,
RPUSD1,ENSG00000007376,113000,RNA pseudouridine synthase domain containing 1,,,,,,
RRP12,ENSG00000052749,23223,ribosomal RNA processing 12 homolog,,,,,,
RRS1,ENSG00000179041,23212,ribosome biogenesis regulator 1 homolog,,,,,,
RSL1D1,ENSG00000171490,26156,ribosomal L1 domain containing 1,,,,,,
RSL24D1,ENSG00000137876,51187,ribosomal L24 domain containing 1,,,,,,
RSPO2,ENSG00000147655,340419,R-spondin 2,,,,,,
RTN1,ENSG00000139970,6252,reticulon 1,,,,,,
RTN2,ENSG00000125744,6253,reticulon 2,,,,,,
RTN4IP1,ENSG00000130347,84816,reticulon 4 interacting protein 1,,,,,,
RTN4RL1,ENSG00000185924,146760,reticulon 4 receptor like 1,,,,,,
RTN4RL2,ENSG00000186907,349667,reticulon 4 receptor like 2,,,,,,
RTP4,ENSG00000136514,64108,receptor transporter protein 4,,,,,,
RUFY4,ENSG00000188282,285180,RUN and FYVE domain containing 4,,,,,,
RUVBL1,ENSG00000175792,8607,RuvB like AAA ATPase 1,,,,,,
RWDD2A,ENSG00000013392,112611,RWD domain containing 2A,,,,,,
S100A3,ENSG00000188015,6274,S100 calcium binding protein A3,,,,,,
S100A8,ENSG00000143546,6279,S100 calcium binding protein A8,,,,,,
S1PR1,ENSG00000170989,1901,sphingosine-1-phosphate receptor 1,,,,,,
S1PR3,ENSG00000213694,1903,sphingosine-1-phosphate receptor 3,,,,,,
SAA1,ENSG00000173432,6288,serum amyloid A1,,,,,,
SAA2,ENSG00000134339,6289,serum amyloid A2,,,,,,
SAMD14,ENSG00000167100,201191,sterile alpha motif domain containing 14,,,,,,
SAMD9L,ENSG00000177409,219285,sterile alpha motif domain containing 9 like,,,,,,
SAMHD1,ENSG00000101347,25939,SAM and HD domain containing deoxynucleoside triphosphate triphosphohydrolase 1,,,,,,
SAMSN1,ENSG00000155307,64092,"SAM domain, SH3 domain and nuclear localization signals 1",,,,,,
SAV1,ENSG00000151748,60485,salvador family WW domain containing protein 1,,,,,,
SBNO2,ENSG00000064932,22904,strawberry notch homolog 2,,,,,,
SBSN,ENSG00000189001,374897,suprabasin,,,,,,
SBSPON,ENSG00000164764,157869,somatomedin B and thrombospondin type 1 domain containing,,,,,,
SCIMP,ENSG00000161929,388325,SLP adaptor and CSK interacting membrane protein,,,,,,
SCN1B,ENSG00000105711,6324,sodium voltage-gated channel beta subunit 1,,,,,,
SDC4,ENSG00000124145,6385,syndecan 4,,,,,,
SDE2,ENSG00000143751,163859,SDE2 telomere maintenance homolog,,,,,,
SEC14L2,ENSG00000100003,23541,SEC14 like lipid binding 2,,,,,,
SEC61G,ENSG00000132432,23480,SEC61 translocon gamma subunit,,,,,,
SELL,ENSG00000188404,6402,selectin L,,,,,,
SELP,ENSG00000174175,6403,selectin P,,,,,,
SELPLG,ENSG00000110876,6404,selectin P ligand,,,,,,
SEMA3B,ENSG00000012171,7869,semaphorin 3B,,,,,,
SEMA3D,ENSG00000153993,223117,semaphorin 3D,,,,,,
SEMA3E,ENSG00000170381,9723,semaphorin 3E,,,,,,
SEMA4F,ENSG00000135622,10505,ssemaphorin 4F,,,,,,
SEMA6D,ENSG00000137872,80031,semaphorin 6D,,,,,,
SERPINA10,ENSG00000140093,51156,serpin family A member 10,,,,,,
SERPINB9,ENSG00000170542,5272,serpin family B member 9,,,,,,
SERPINE1,ENSG00000106366,5054,serpin family E member 1,,,,,,
SERPINE2,ENSG00000135919,5270,serpin family E member 2,,,,,,
SERPINH1,ENSG00000149257,871,serpin family H member 1,,,,,,
SERTAD4,ENSG00000082497,56256,SERTA domain containing 4,,,,,,
SESN2,ENSG00000130766,83667,sestrin 2,,,,,,
SEZ6L,ENSG00000100095,23544,seizure related 6 homolog like,,,,,,
SFMBT2,ENSG00000198879,57713,Scm like with four mbt domains 2,,,,,,
SFRP4,ENSG00000106483,6424,secreted frizzled related protein 4,,,,,,
SGCD,ENSG00000170624,6444,sarcoglycan delta,,,,,,
SGCG,ENSG00000102683,6445,sarcoglycan gamma,,,,,,
SGK1,ENSG00000118515,6446,serum/glucocorticoid regulated kinase 1,,,,,,
SH2B2,ENSG00000160999,10603,SH2B adaptor protein 2,,,,,,
SH3BP2,ENSG00000087266,6452,SH3 domain binding protein 2,,,,,,
SH3BP5L,ENSG00000175137,80851,SH3 binding domain protein 5 like,,,,,,
SH3D21,ENSG00000214193,79729,SH3 domain containing 21,,,,,,
SH3PXD2B,ENSG00000174705,285590,SH3 and PX domains 2B,,,,,,
SH3RF2,ENSG00000156463,153769,SH3 domain containing ring finger 2,,,,,,
SH3TC2,ENSG00000169247,79628,SH3 domain and tetratricopeptide repeats 2,,,,,,
SHANK2,ENSG00000162105,22941,SH3 and multiple ankyrin repeat domains 2,,,,,,
SHC4,ENSG00000185634,399694,SHC adaptor protein 4,,,,,,
SHISA9,ENSG00000237515,729993,shisa family member 9,,,,,,
SHMT1,ENSG00000176974,6470,serine hydroxymethyltransferase 1,,,,,,
SHMT2,ENSG00000182199,6472,serine hydroxymethyltransferase 2,,,,,,
SIGLEC1,ENSG00000088827,6614,sialic acid binding Ig like lectin 1,,,,,,
SIK1,ENSG00000142178,150094,salt inducible kinase 1,,,,,,
SIK2,ENSG00000170145,23235,salt inducible kinase 2,,,,,,
SKA2,ENSG00000182628,348235,spindle and kinetochore associated complex subunit 2,,,,,,
SKAP2,ENSG00000005020,8935,src kinase associated phosphoprotein 2,,,,,,
SLA,ENSG00000155926,6503,Src like adaptor,,,,,,
SLAMF6,ENSG00000162739,114836,SLAM family member 6,,,,,,
SLC10A3,ENSG00000126903,8273,solute carrier family 10 member 3,,,,,,
SLC13A4,ENSG00000164707,26266,solute carrier family 13 member 4,,,,,,
SLC13A5,ENSG00000141485,284111,solute carrier family 13 member 5,,,,,,
SLC16A1,ENSG00000155380,6566,solute carrier family 16 member 1,,,,,,
SLC16A3,ENSG00000141526,9123,solute carrier family 16 member 3,,,,,,
SLC16A6,ENSG00000108932,9120,solute carrier family 16 member 6,,,,,,
SLC18A2,ENSG00000165646,6571,solute carrier family 18 member A2,,,,,,
SLC18B1,ENSG00000146409,116843,solute carrier family 18 member B1,,,,,,
SLC22A4,ENSG00000197208,6583,solute carrier family 22 member 4,,,,,,
SLC23A3,ENSG00000213901,151295,solute carrier family 23 member 3,,,,,,
SLC24A3,ENSG00000185052,57419,solute carrier family 24 member 3,,,,,,
SLC25A18,ENSG00000182902,83733,solute carrier family 25 member 18,,,,,,
SLC25A25,ENSG00000148339,114789,solute carrier family 25 member 25,,,,,,
SLC25A27,ENSG00000153291,9481,solute carrier family 25 member 27,,,,,,
SLC25A33,ENSG00000171612,84275,solute carrier family 25 member 33,,,,,,
SLC27A4,ENSG00000167114,10999,solute carrier family 27 member 4,,,,,,
SLC29A4,ENSG00000164638,222962,solute carrier family 29 member 4,,,,,,
SLC2A1,ENSG00000117394,6513,solute carrier family 2 member 1,,,,,,
SLC2A10,ENSG00000197496,81031,solute carrier family 2 member 10,,,,,,
SLC2A12,ENSG00000146411,154091,solute carrier family 2 member 12,,,,,,
SLC2A3,ENSG00000059804,6515,solute carrier family 2 member 3,,,,,,
SLC2A4,ENSG00000181856,6517,solute carrier family 2 member 4,,,,,,
SLC35B1,ENSG00000121073,10237,solute carrier family 35 member B1,,,,,,
SLC35F1,ENSG00000196376,222553,solute carrier family 35 member F1,,,,,,
SLC35G1,ENSG00000176273,159371,solute carrier family 35 member G1,,,,,,
SLC37A2,ENSG00000134955,219855,solute carrier family 37 member 2,,,,,,
SLC38A1,ENSG00000111371,81539,solute carrier family 38 member 1,,,,,,
SLC38A3,ENSG00000188338,10991,solute carrier family 38 member 3,,,,,,
SLC39A14,ENSG00000104635,23516,solute carrier family 39 member 14,,,,,,
SLC39A8,ENSG00000138821,64116,solute carrier family 39 member 8,,,,,,
SLC3A2,ENSG00000168003,6520,solute carrier family 3 member 2,,,,,,
SLC41A1,ENSG00000133065,254428,solute carrier family 41 member 1,,,,,,
SLC41A2,ENSG00000136052,84102,solute carrier family 41 member 2,,,,,,
SLC43A1,ENSG00000149150,8501,solute carrier family 43 member 1,,,,,,
SLC43A2,ENSG00000167703,124935,solute carrier family 43 member 2,,,,,,
SLC46A3,ENSG00000139508,283537,solute carrier family 46 member 3,,,,,,
SLC47A1,ENSG00000142494,55244,solute carrier family 47 member 1,,,,,,
SLC4A8,ENSG00000050438,9498,solute carrier family 4 member 8,,,,,,
SLC5A8,ENSG00000256870,160728,solute carrier family 5 member 8,,,,,,
SLC7A1,ENSG00000139514,6541,solute carrier family 7 member 1,,,,,,
SLC7A3,ENSG00000165349,84889,solute carrier family 7 member 3,,,,,,
SLC7A5,ENSG00000103257,8140,solute carrier family 7 member 5,,,,,,
SLC7A7,ENSG00000155465,9056,solute carrier family 7 member 7,,,,,,
SLC8A3,ENSG00000100678,6547,solute carrier family 8 member A3,,,,,,
SLC9A3R1,ENSG00000109062,9368,SLC9A3 regulator 1,,,,,,
SLCO2B1,ENSG00000137491,11309,solute carrier organic anion transporter family member 2B1,,,,,,
SLCO5A1,ENSG00000137571,81796,solute carrier organic anion transporter family member 5A1,,,,,,
SLIT3,ENSG00000184347,6586,slit guidance ligand 3,,,,,,
SLITRK6,ENSG00000184564,84189,SLIT and NTRK like family member 6,,,,,,
SLPI,ENSG00000124107,6590,secretory leukocyte peptidase inhibitor,,,,,,
SMCHD1,ENSG00000101596,23347,structural maintenance of chromosomes flexible hinge domain containing 1,,,,,,
SMIM3,ENSG00000256235,85027,small integral membrane protein 3,,,,,,
SMO,ENSG00000128602,6608,"smoothened, frizzled class receptor",,,,,,
SMOC1,ENSG00000198732,64093,SPARC related modular calcium binding 1,,,,,,
SMOC2,ENSG00000112562,64094,SPARC related modular calcium binding 2,,,,,,
SMOX,ENSG00000088826,54498,spermine oxidase,,,,,,
SMTN,ENSG00000183963,6525,smoothelin,,,,,,
SNAI1,ENSG00000124216,6615,snail family transcriptional repressor 1,,,,,,
SNAPC1,ENSG00000023608,6617,small nuclear RNA activating complex polypeptide 1,,,,,,
SNX10,ENSG00000086300,29887,sorting nexin 10,,,,,,
SNX20,ENSG00000167208,124460,sorting nexin 20,,,,,,
SNX32,ENSG00000172803,254122,sorting nexin 32,,,,,,
SNX33,ENSG00000173548,257364,sorting nexin 33,,,,,,
SOCS1,ENSG00000185338,8651,suppressor of cytokine signaling 1,,,,,,
SOCS2,ENSG00000120833,8835,suppressor of cytokine signaling 2,,,,,,
SOCS3,ENSG00000184557,9021,suppressor of cytokine signaling 3,,,,,,
SOD2,ENSG00000112096,6648,superoxide dismutase 2,,,,,,
SORL1,ENSG00000137642,6653,sortilin related receptor 1,,,,,,
SOX11,ENSG00000176887,6664,SRY-box transcription factor 11,,,,,,
SOX13,ENSG00000143842,9580,SRY-box transcription factor 13,,,,,,
SOX6,ENSG00000110693,55553,SRY-box transcription factor 6,,,,,,
SOX8,ENSG00000005513,30812,SRY-box transcription factor 8,,,,,,
SOX9,ENSG00000125398,6662,SRY-box transcription factor 9,,,,,,
SPAG17,ENSG00000155761,200162,sperm associated antigen 17,,,,,,
SPARCL1,ENSG00000152583,8404,SPARC like 1,,,,,,
SPATA13,ENSG00000182957,221178,spermatogenesis associated 13,,,,,,
SPI1,ENSG00000066336,6688,Spi-1 proto-oncogene,,,,,,
SPON2,ENSG00000159674,10417,spondin 2,,,,,,
SPP1,ENSG00000118785,6696,secreted phosphoprotein 1,,,,,,
SPRY4,ENSG00000187678,81848,sprouty RTK signaling antagonist 4,,,,,,
SPSB1,ENSG00000171621,80176,splA/ryanodine receptor domain and SOCS box containing 1,,,,,,
SPSB2,ENSG00000111671,84727,splA/ryanodine receptor domain and SOCS box containing 2,,,,,,
SPSB4,ENSG00000175093,92369,splA/ryanodine receptor domain and SOCS box containing 4,,,,,,
SPTBN4,ENSG00000160460,57731,"spectrin beta, non-erythrocytic 4",,,,,,
SPTLC2,ENSG00000100596,9517,serine palmitoyltransferase long chain base subunit 2,,,,,,
SPTLC3,ENSG00000172296,55304,serine palmitoyltransferase long chain base subunit 3,,,,,,
SPTSSB,ENSG00000196542,165679,serine palmitoyltransferase small subunit B,,,,,,
SRD5A1,ENSG00000145545,6715,steroid 5 alpha-reductase 1,,,,,,
SREBF1,ENSG00000072310,6720,sterol regulatory element binding transcription factor 1,,,,,,
SRM,ENSG00000116649,6723,spermidine synthase,,,,,,
SRPX2,ENSG00000102359,27286,sushi repeat containing protein X-linked 2,,,,,,
SSC5D,ENSG00000179954,284297,scavenger receptor cysteine rich family member with 5 domains,,,,,,
ST3GAL6,ENSG00000064225,10402,"ST3 beta-galactoside alpha-2,3-sialyltransferase 6",,,,,,
ST6GAL2,ENSG00000144057,84620,"ST6 beta-galactoside alpha-2,6-sialyltransferase 2",,,,,,
STARD8,ENSG00000130052,9754,StAR related lipid transfer domain containing 8,,,,,,
STAT3,ENSG00000168610,6774,signal transducer and activator of transcription 3,,,,,,
STC1,ENSG00000159167,6781,stanniocalcin 1,,,,,,
STEAP1,ENSG00000164647,26872,STEAP family member 1,,,,,,
STEAP3,ENSG00000115107,55240,STEAP3 metalloreductase,,,,,,
STK32B,ENSG00000152953,55351,serine/threonine kinase 32B,,,,,,
STX11,ENSG00000135604,8676,syntaxin 11,,,,,,
STXBP6,ENSG00000168952,29091,syntaxin binding protein 6,,,,,,
SUCNR1,ENSG00000198829,56670,succinate receptor 1,,,,,,
SULF1,ENSG00000137573,23213,sulfatase 1,,,,,,
SYCP2,ENSG00000196074,10388,synaptonemal complex protein 2,,,,,,
SYK,ENSG00000165025,6850,spleen associated tyrosine kinase,,,,,,
SYNC,ENSG00000162520,81493,"syncoilin, intermediate filament protein",,,,,,
SYNDIG1,ENSG00000101463,79953,synapse differentiation inducing 1,,,,,,
SYNPO,ENSG00000171992,11346,synaptopodin,,,,,,
SYT13,ENSG00000019505,57586,synaptotagmin 13,,,,,,
SYT7,ENSG00000011347,9066,synaptotagmin 7,,,,,,
SYTL1,ENSG00000142765,84958,synaptotagmin like 1,,,,,,
SYTL4,ENSG00000102362,94121,synaptotagmin like 4,,,,,,
TACSTD2,ENSG00000184292,4070,tumor associated calcium signal transducer 2,,,,,,
TAF1D,ENSG00000166012,79101,"TATA-box binding protein associated factor, RNA polymerase I subunit D",,,,,,
TAP1,ENSG00000168394,6890,"transporter 1, ATP binding cassette subfamily B member",,,,,,
TBC1D15,ENSG00000121749,64786,TBC1 domain family member 15,,,,,,
TBCCD1,ENSG00000113838,55171,TBCC domain containing 1,,,,,,
TBX18,ENSG00000112837,9096,T-box transcription factor 18,,,,,,
TBX4,ENSG00000121075,9496,T-box transcription factor 4,,,,,,
TBX5,ENSG00000089225,6910,T-box transcription factor 5,,,,,,
TBXA2R,ENSG00000006638,6915,thromboxane A2 receptor,,,,,,
TCF24,ENSG00000261787,100129654,transcription factor 24,,,,,,
TCTA,ENSG00000145022,6988,T cell leukemia translocation altered,,,,,,
TDO2,ENSG00000151790,6999,"tryptophan 2,3-dioxygenase",,,,,,
TENM3,ENSG00000218336,55714,teneurin transmembrane protein 3,,,,,,
TES,ENSG00000135269,26136,testin LIM domain protein,,,,,,
TESC,ENSG00000088992,54997,tescalcin,,,,,,
TET1,ENSG00000138336,80312,tet methylcytosine dioxygenase 1,,,,,,
TFEC,ENSG00000105967,22797,transcription factor EC,,,,,,
TFPI2,ENSG00000105825,7980,tissue factor pathway inhibitor 2,,,,,,
TGFB3,ENSG00000119699,7043,transforming growth factor beta 3,,,,,,
TGFBR1,ENSG00000106799,7046,transforming growth factor beta receptor 1,,,,,,
TGIF1,ENSG00000177426,7050,TGFB induced factor homeobox 1,,,,,,
TGM2,ENSG00000198959,7052,transglutaminase 2,,,,,,
THAP3,ENSG00000041988,90326,THAP domain containing 3,,,,,,
THBS1,ENSG00000137801,7057,thrombospondin 1,,,,,,
THBS2,ENSG00000186340,7058,thrombospondin 2,,,,,,
THBS3,ENSG00000169231,7059,thrombospondin 3,,,,,,
THEMIS2,ENSG00000130775,9473,thymocyte selection associated family member 2,,,,,,
THRA,ENSG00000126351,7067,thyroid hormone receptor alpha,,,,,,
THSD4,ENSG00000187720,79875,thrombospondin type 1 domain containing 4,,,,,,
TIFA,ENSG00000145365,92610,TRAF interacting protein with forkhead associated domain,,,,,,
TIMELESS,ENSG00000111602,8914,timeless circadian regulator,,,,,,
TIMM23,ENSG00000265354,100287932,translocase of inner mitochondrial membrane 23,,,,,,
TIMP1,ENSG00000102265,7076,TIMP metallopeptidase inhibitor 1,,,,,,
TIMP3,ENSG00000100234,7078,TIMP metallopeptidase inhibitor 3,,,,,,
TIMP4,ENSG00000157150,7079,TIMP metallopeptidase inhibitor 4,,,,,,
TIPARP,ENSG00000163659,25976,TCDD inducible poly(ADP-ribose) polymerase,,,,,,
TLE2,ENSG00000065717,7089,"TLE family member 2, transcriptional corepressor",,,,,,
TLL1,ENSG00000038295,7092,tolloid like 1,,,,,,
TLN2,ENSG00000171914,83660,talin 2,,,,,,
TLR2,ENSG00000137462,7097,toll like receptor 2,,,,,,
TLR7,ENSG00000196664,51284,toll like receptor 7,,,,,,
TLR8,ENSG00000101916,51311,toll like receptor 8,,,,,,
TM4SF1,ENSG00000169908,4071,transmembrane 4 L six family member 1,,,,,,
TM7SF3,ENSG00000064115,51768,transmembrane 7 superfamily member 3,,,,,,
TMED5,ENSG00000117500,50999,transmembrane p24 trafficking protein 5,,,,,,
TMEM120A,ENSG00000189077,83862,transmembrane protein 120A,,,,,,
TMEM132E,ENSG00000181291,124842,transmembrane protein 132E,,,,,,
TMEM14A,ENSG00000096092,28978,transmembrane protein 14A,,,,,,
TMEM150C,ENSG00000249242,441027,transmembrane protein 150C,,,,,,
TMEM176A,ENSG00000002933,55365,transmembrane protein 176A,,,,,,
TMEM176B,ENSG00000106565,28959,transmembrane protein 176B,,,,,,
TMEM178B,ENSG00000261115,100507421,transmembrane protein 178B,,,,,,
TMEM182,ENSG00000170417,130827,transmembrane protein 182,,,,,,
TMEM184A,ENSG00000164855,202915,transmembrane protein 184A,,,,,,
TMEM196,ENSG00000173452,256130,transmembrane protein 196,,,,,,
TMEM198,ENSG00000188760,130612,transmembrane protein 198,,,,,,
TMEM200B,ENSG00000253304,399474,transmembrane protein 200B,,,,,,
TMEM253,ENSG00000232070,643382,transmembrane protein 253,,,,,,
TMEM38B,ENSG00000095209,55151,transmembrane protein 38B,,,,,,
TMEM51,ENSG00000171729,55092,transmembrane protein 51,,,,,,
TMEM65,ENSG00000164983,157378,transmembrane protein 65,,,,,,
TMOD1,ENSG00000136842,7111,tropomodulin 1,,,,,,
TMPRSS11A,ENSG00000187054,339967,transmembrane serine protease 11A,,,,,,
TMSB10,ENSG00000034510,9168,thymosin beta 10,,,,,,
TNC,ENSG00000041982,3371,tenascin C,,,,,,
TNF,ENSG00000232810,7124,tumor necrosis factor,,,,,,
TNFAIP3,ENSG00000118503,7128,TNF alpha induced protein 3,,,,,,
TNFAIP6,ENSG00000123610,7130,TNF alpha induced protein 6,,,,,,
TNFRSF1B,ENSG00000028137,7133,TNF receptor superfamily member 1B,,,,,,
TNFRSF9,ENSG00000049249,3604,TNF receptor superfamily member 9,,,,,,
TNFSF11,ENSG00000120659,8600,TNF superfamily member 11,,,,,,
TNFSF12,ENSG00000239697,8742,TNF superfamily member 12,,,,,,
TNFSF15,ENSG00000181634,9966,TNF superfamily member 15,,,,,,
TNIP1,ENSG00000145901,10318,TNFAIP3 interacting protein 1,,,,,,
TNK2,ENSG00000061938,10188,tyrosine kinase non receptor 2,,,,,,
TNS1,ENSG00000079308,7145,tensin 1,,,,,,
TOB1,ENSG00000141232,10140,"transducer of ERBB2, 1",,,,,,
TOP2A,ENSG00000131747,7153,DNA topoisomerase II alpha,,,,,,
TOR3A,ENSG00000186283,64222,torsin family 3 member A,,,,,,
TPBGL,ENSG00000261594,100507050,trophoblast glycoprotein like,,,,,,
TPM4,ENSG00000167460,7171,tropomyosin 4,,,,,,
TPPP3,ENSG00000159713,51673,tubulin polymerization promoting protein family member 3,,,,,,
TRA2B,ENSG00000136527,6434,transformer 2 beta homolog,,,,,,
TRABD2B,ENSG00000269113,388630,TraB domain containing 2B,,,,,,
TRAF3,ENSG00000131323,7187,TNF receptor associated factor 3,,,,,,
TRAF3IP3,ENSG00000009790,80342,TRAF3 interacting protein 3,,,,,,
TREM1,ENSG00000124731,54210,triggering receptor expressed on myeloid cells 1,,,,,,
TREML2,ENSG00000112195,79865,triggering receptor expressed on myeloid cells like 2,,,,,,
TREML4,ENSG00000188056,285852,triggering receptor expressed on myeloid cells like 4,,,,,,
TRIB1,ENSG00000173334,10221,tribbles pseudokinase 1,,,,,,
TRIM29,ENSG00000137699,23650,tripartite motif containing 29,,,,,,
TRIM3,ENSG00000110171,10612,tripartite motif containing 3,,,,,,
TRIM7,ENSG00000146054,81786,tripartite motif containing 7,,,,,,
TRNP1,ENSG00000253368,388610,TMF1 regulated nuclear protein 1,,,,,,
TRPM3,ENSG00000083067,80036,transient receptor potential cation channel subfamily M member 3,,,,,,
TRPV2,ENSG00000187688,51393,transient receptor potential cation channel subfamily V member 2,,,,,,
TRPV3,ENSG00000167723,162514,transient receptor potential cation channel subfamily V member 3,,,,,,
TSHR,ENSG00000165409,7253,thyroid stimulating hormone receptor,,,,,,
TSKU,ENSG00000182704,25987,"tsukushi, small leucine rich proteoglycan",,,,,,
TSLP,ENSG00000145777,85480,thymic stromal lymphopoietin,,,,,,
TSPAN12,ENSG00000106025,23554,tetraspanin 12,,,,,,
TSPAN15,ENSG00000099282,23555,tetraspanin 15,,,,,,
TSPAN17,ENSG00000048140,26262,tetraspanin 17,,,,,,
TSPAN2,ENSG00000134198,10100,tetraspanin 2,,,,,,
TSPYL4,ENSG00000187189,23270,TSPY like 4,,,,,,
TSPYL5,ENSG00000180543,85453,TSPY like 5,,,,,,
TSSK6,ENSG00000178093,83983,testis specific serine kinase 6,,,,,,
TTC25,ENSG00000204815,83538,tetratricopeptide repeat domain 25,,,,,,
TTC39C,ENSG00000168234,125488,tetratricopeptide repeat domain 39C,,,,,,
TTL,ENSG00000114999,150465,tubulin tyrosine ligase,,,,,,
TTLL1,ENSG00000100271,25809,tubulin tyrosine ligase like 1,,,,,,
TUBB3,ENSG00000258947,10381,tubulin beta 3 class III,,,,,,
TUFT1,ENSG00000143367,7286,tuftelin 1,,,,,,
TWIST2,ENSG00000233608,117581,twist family bHLH transcription factor 2,,,,,,
TXNDC16,ENSG00000087301,57544,thioredoxin domain containing 16,,,,,,
TXNL4A,ENSG00000141759,10907,thioredoxin like 4A,,,,,,
TYRO3,ENSG00000092445,7301,TYRO3 protein tyrosine kinase,,,,,,
TYROBP,ENSG00000011600,7305,TYRO protein tyrosine kinase binding protein,,,,,,
UBALD2,ENSG00000185262,283991,UBA like domain containing 2,,,,,,
UBAP1,ENSG00000165006,51271,ubiquitin associated protein 1,,,,,,
UCN2,ENSG00000145040,90226,urocortin 2,,,,,,
UCP3,ENSG00000175564,7352,uncoupling protein 3,,,,,,
UFSP1,ENSG00000176125,402682,UFM1 specific peptidase 1 (inactive),,,,,,
UGCG,ENSG00000148154,7357,UDP-glucose ceramide glucosyltransferase,,,,,,
UPP1,ENSG00000183696,7378,uridine phosphorylase 1,,,,,,
URB2,ENSG00000135763,9816,URB2 ribosome biogenesis homolog,,,,,,
USP28,ENSG00000048028,57646,ubiquitin specific peptidase 28,,,,,,
USP31,ENSG00000103404,57478,ubiquitin specific peptidase 31,,,,,,
USP36,ENSG00000055483,57602,ubiquitin specific peptidase 36,,,,,,
USP37,ENSG00000135913,57695,ubiquitin specific peptidase 37,,,,,,
VAMP1,ENSG00000139190,6843,vesicle associated membrane protein 1,,,,,,
VANGL1,ENSG00000173218,81839,VANGL planar cell polarity protein 1,,,,,,
VAT1L,ENSG00000171724,57687,vesicle amine transport 1 like,,,,,,
VAV1,ENSG00000141968,7409,vav guanine nucleotide exchange factor 1,,,,,,
VEGFA,ENSG00000112715,7422,vascular endothelial growth factor A,,,,,,
VGLL3,ENSG00000206538,389136,vestigial like family member 3,,,,,,
VIPR1,ENSG00000114812,7433,vasoactive intestinal peptide receptor 1,,,,,,
VIT,ENSG00000205221,5212,vitrin,,,,,,
VLDLR,ENSG00000147852,7436,very low density lipoprotein receptor,,,,,,
VPS37B,ENSG00000139722,79720,VPS37B subunit of ESCRT-I,,,,,,
VPS37D,ENSG00000176428,155382,VPS37D subunit of ESCRT-I,,,,,,
VSIG10,ENSG00000176834,54621,V-set and immunoglobulin domain containing 10,,,,,,
VSIG4,ENSG00000155659,11326,V-set and immunoglobulin domain containing 4,,,,,,
VSNL1,ENSG00000163032,7447,visinin like 1,,,,,,
VSTM5,ENSG00000214376,387804,V-set and transmembrane domain containing 5,,,,,,
VWA1,ENSG00000179403,64856,von Willebrand factor A domain containing 1,,,,,,
VWA2,ENSG00000165816,340706,von Willebrand factor A domain containing 2,,,,,,
VWF,ENSG00000110799,7450,von Willebrand factor,,,,,,
WBP1,ENSG00000239779,23559,WW domain binding protein 1,,,,,,
WDR54,ENSG00000005448,84058,WD repeat domain 54,,,,,,
WDR5B,ENSG00000196981,54554,WD repeat domain 5B,,,,,,
WDR74,ENSG00000133316,54663,WD repeat domain 74,,,,,,
WDR86,ENSG00000187260,349136,WD repeat domain 86,,,,,,
WFDC1,ENSG00000103175,58189,WAP four-disulfide core domain 1,,,,,,
WIPF3,ENSG00000122574,644150,WAS/WASL interacting protein family member 3,,,,,,
WNT10B,ENSG00000169884,7480,Wnt family member 10B,,,,,,
WNT11,ENSG00000085741,7481,Wnt family member 11,,,,,,
WNT3A,ENSG00000154342,89780,Wnt family member 3A,,,,,,
WNT7B,ENSG00000188064,7477,Wnt family member 7B,,,,,,
XBP1,ENSG00000100219,7494,X-box binding protein 1,,,,,,
YPEL4,ENSG00000166793,219539,yippee like 4,,,,,,
ZBP1,ENSG00000124256,81030,Z-DNA binding protein 1,,,,,,
ZBTB42,ENSG00000179627,100128927,zinc finger and BTB domain containing 42,,,,,,
ZC2HC1C,ENSG00000119703,79696,zinc finger C2HC-type containing 1C,,,,,,
ZC3H12A,ENSG00000163874,80149,zinc finger CCCH-type containing 12A,,,,,,
ZC3H6,ENSG00000188177,376940,zinc finger CCCH-type containing 6,,,,,,
ZDHHC8,ENSG00000099904,29801,zinc finger DHHC-type containing 8,,,,,,
ZER1,ENSG00000160445,10444,zyg-11 related cell cycle regulator,,,,,,
ZFAND5,ENSG00000107372,7763,zinc finger AN1-type containing 5,,,,,,
ZFP3,ENSG00000180787,124961,ZFP3 zinc finger protein,,,,,,
ZFP36,ENSG00000128016,7538,ZFP36 ring finger protein,,,,,,
ZFP36L1,ENSG00000185650,677,ZFP36 ring finger protein like 1,,,,,,
ZFP69,ENSG00000187815,339559,ZFP69 zinc finger protein,,,,,,
ZFYVE21,ENSG00000100711,79038,zinc finger FYVE-type containing 21,,,,,,
ZFYVE28,ENSG00000159733,57732,zinc finger FYVE-type containing 28,,,,,,
ZHX2,ENSG00000178764,22882,zinc fingers and homeoboxes 2,,,,,,
ZKSCAN4,ENSG00000187626,387032,zinc finger with KRAB and SCAN domains 4,,,,,,
ZSWIM3,ENSG00000132801,140831,zinc finger SWIM-type containing 3,,,,,,
ZYG11A,ENSG00000203995,440590,"zyg-11 family member A, cell cycle regulator",,,,,,
